# Supplementary material for: Cellular Allostatic Load is linked to Increased Energy Expenditure and Accelerated Biological Aging
Source: bioRxiv or medRxiv preprint supplement (doi:10.1101/2022.02.22.481548), 2023-06-16

Figure S1

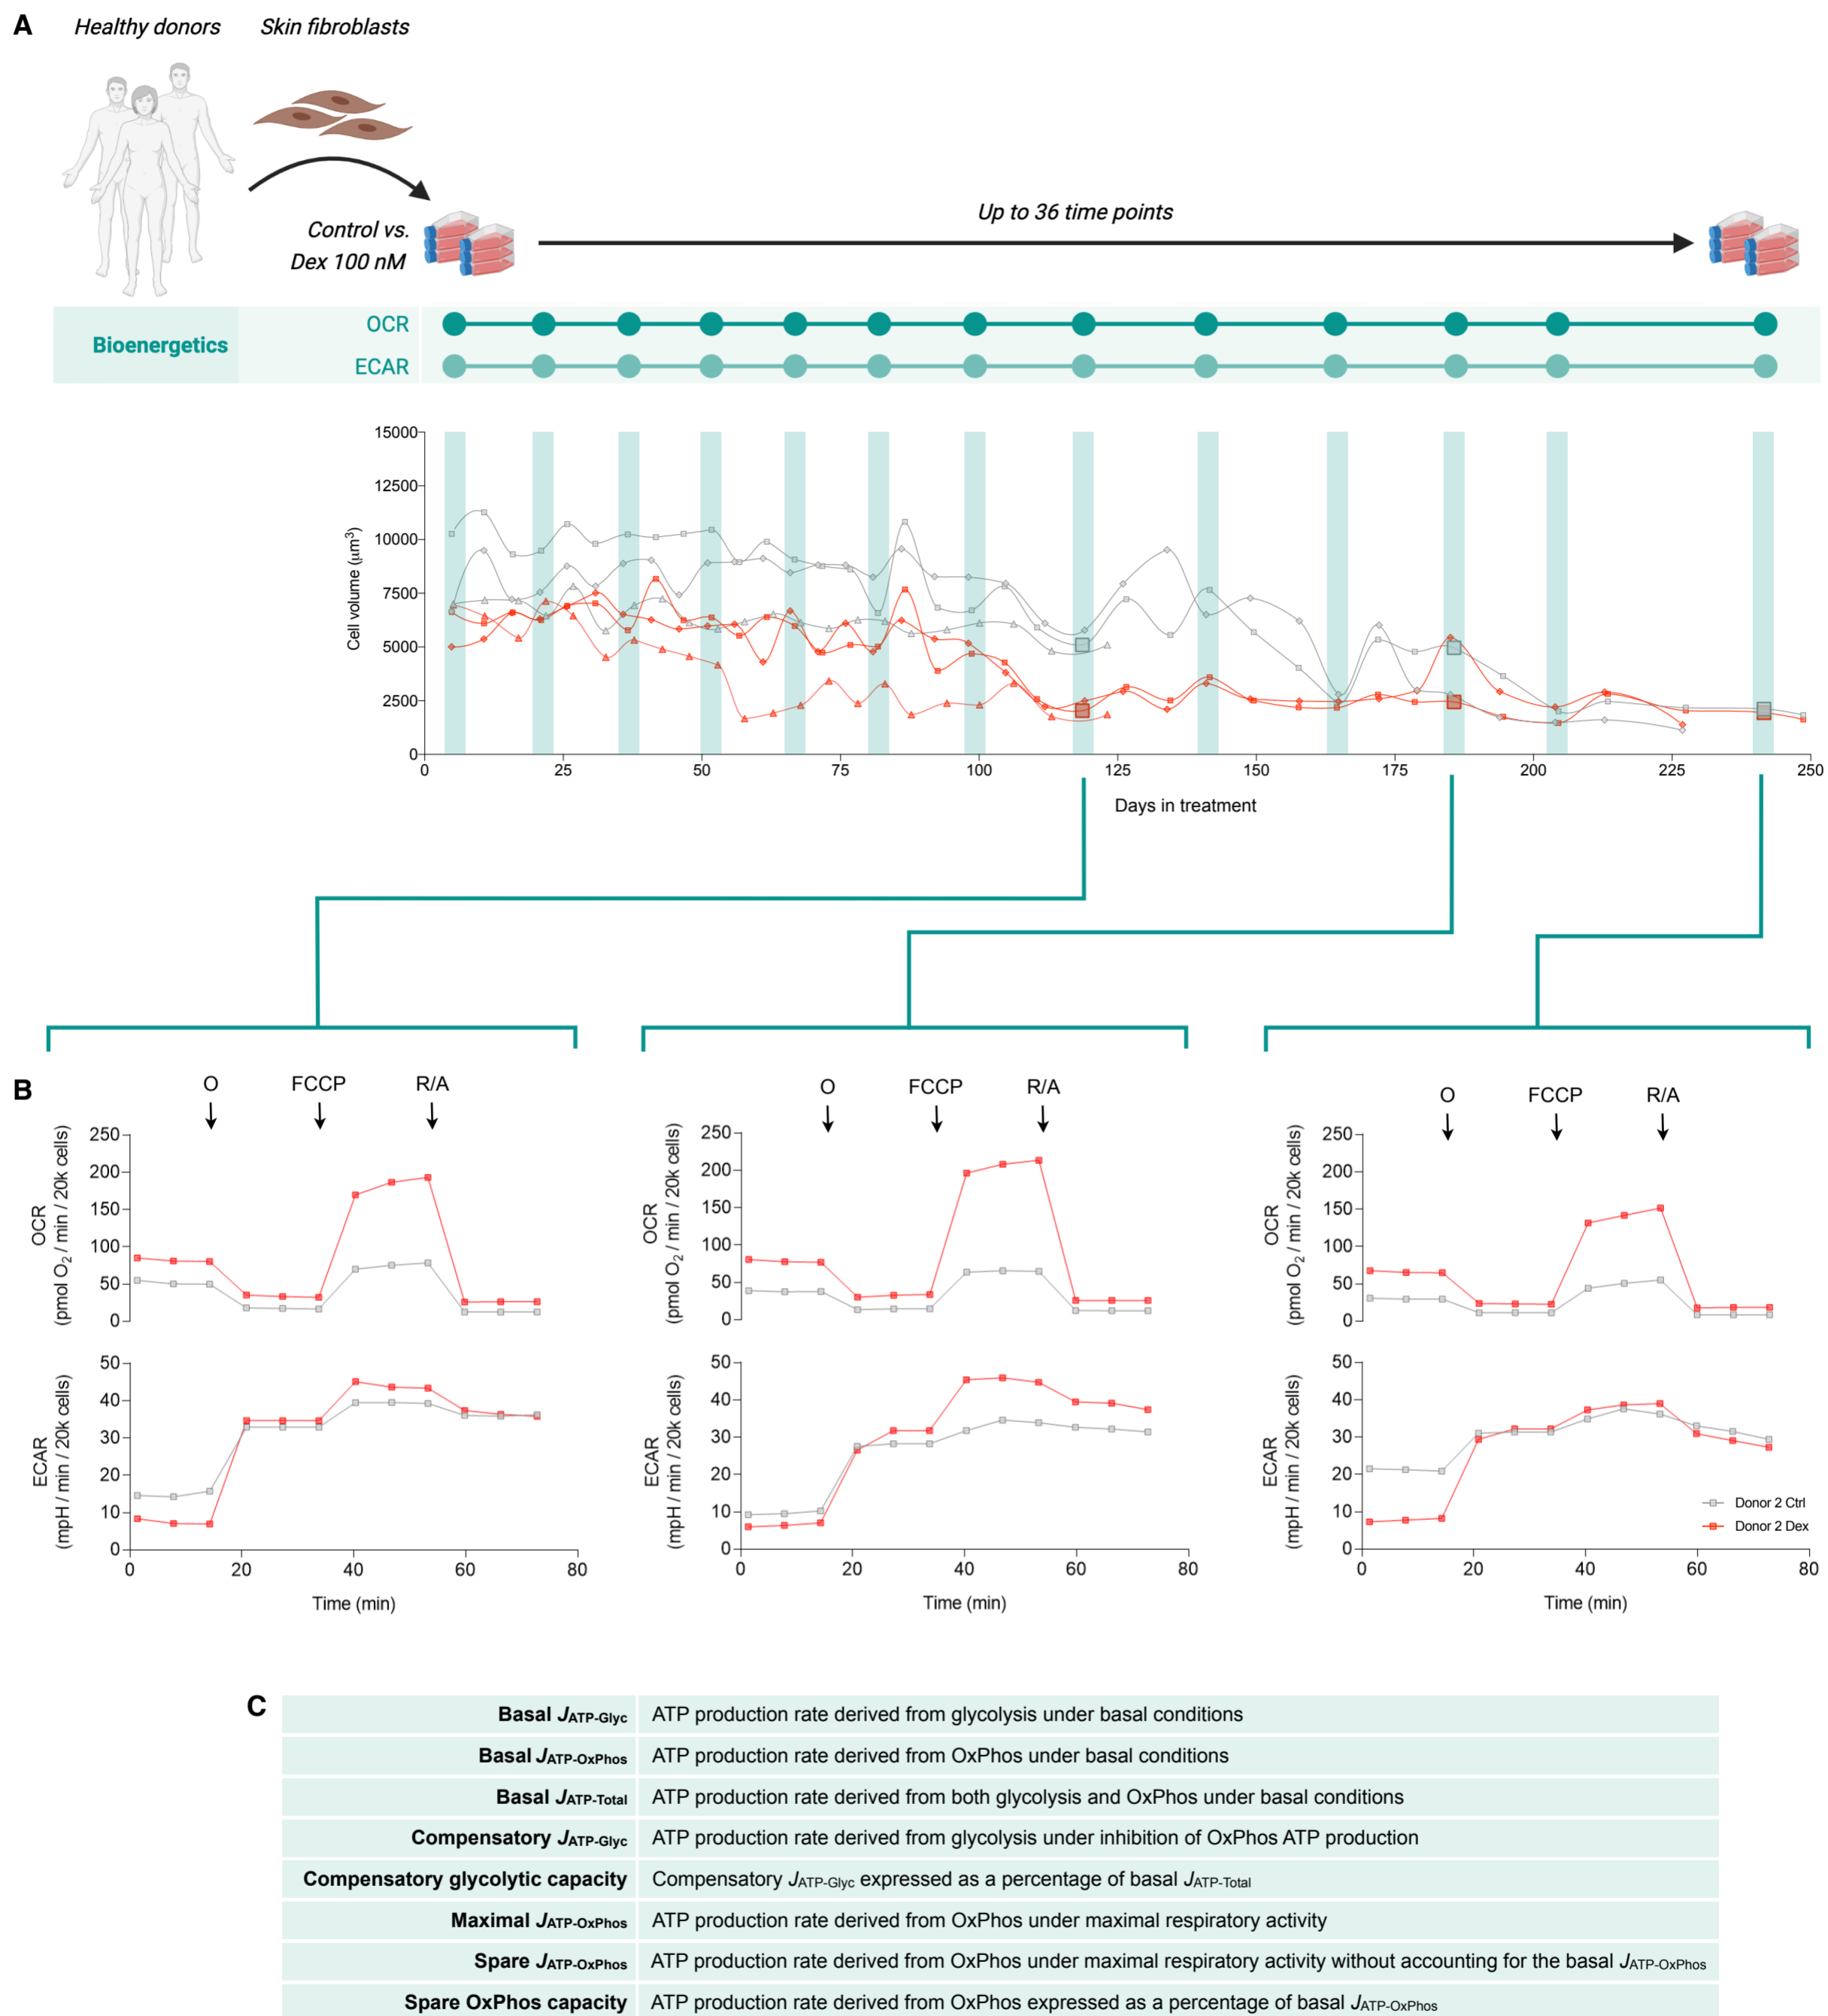

**Figure S2**

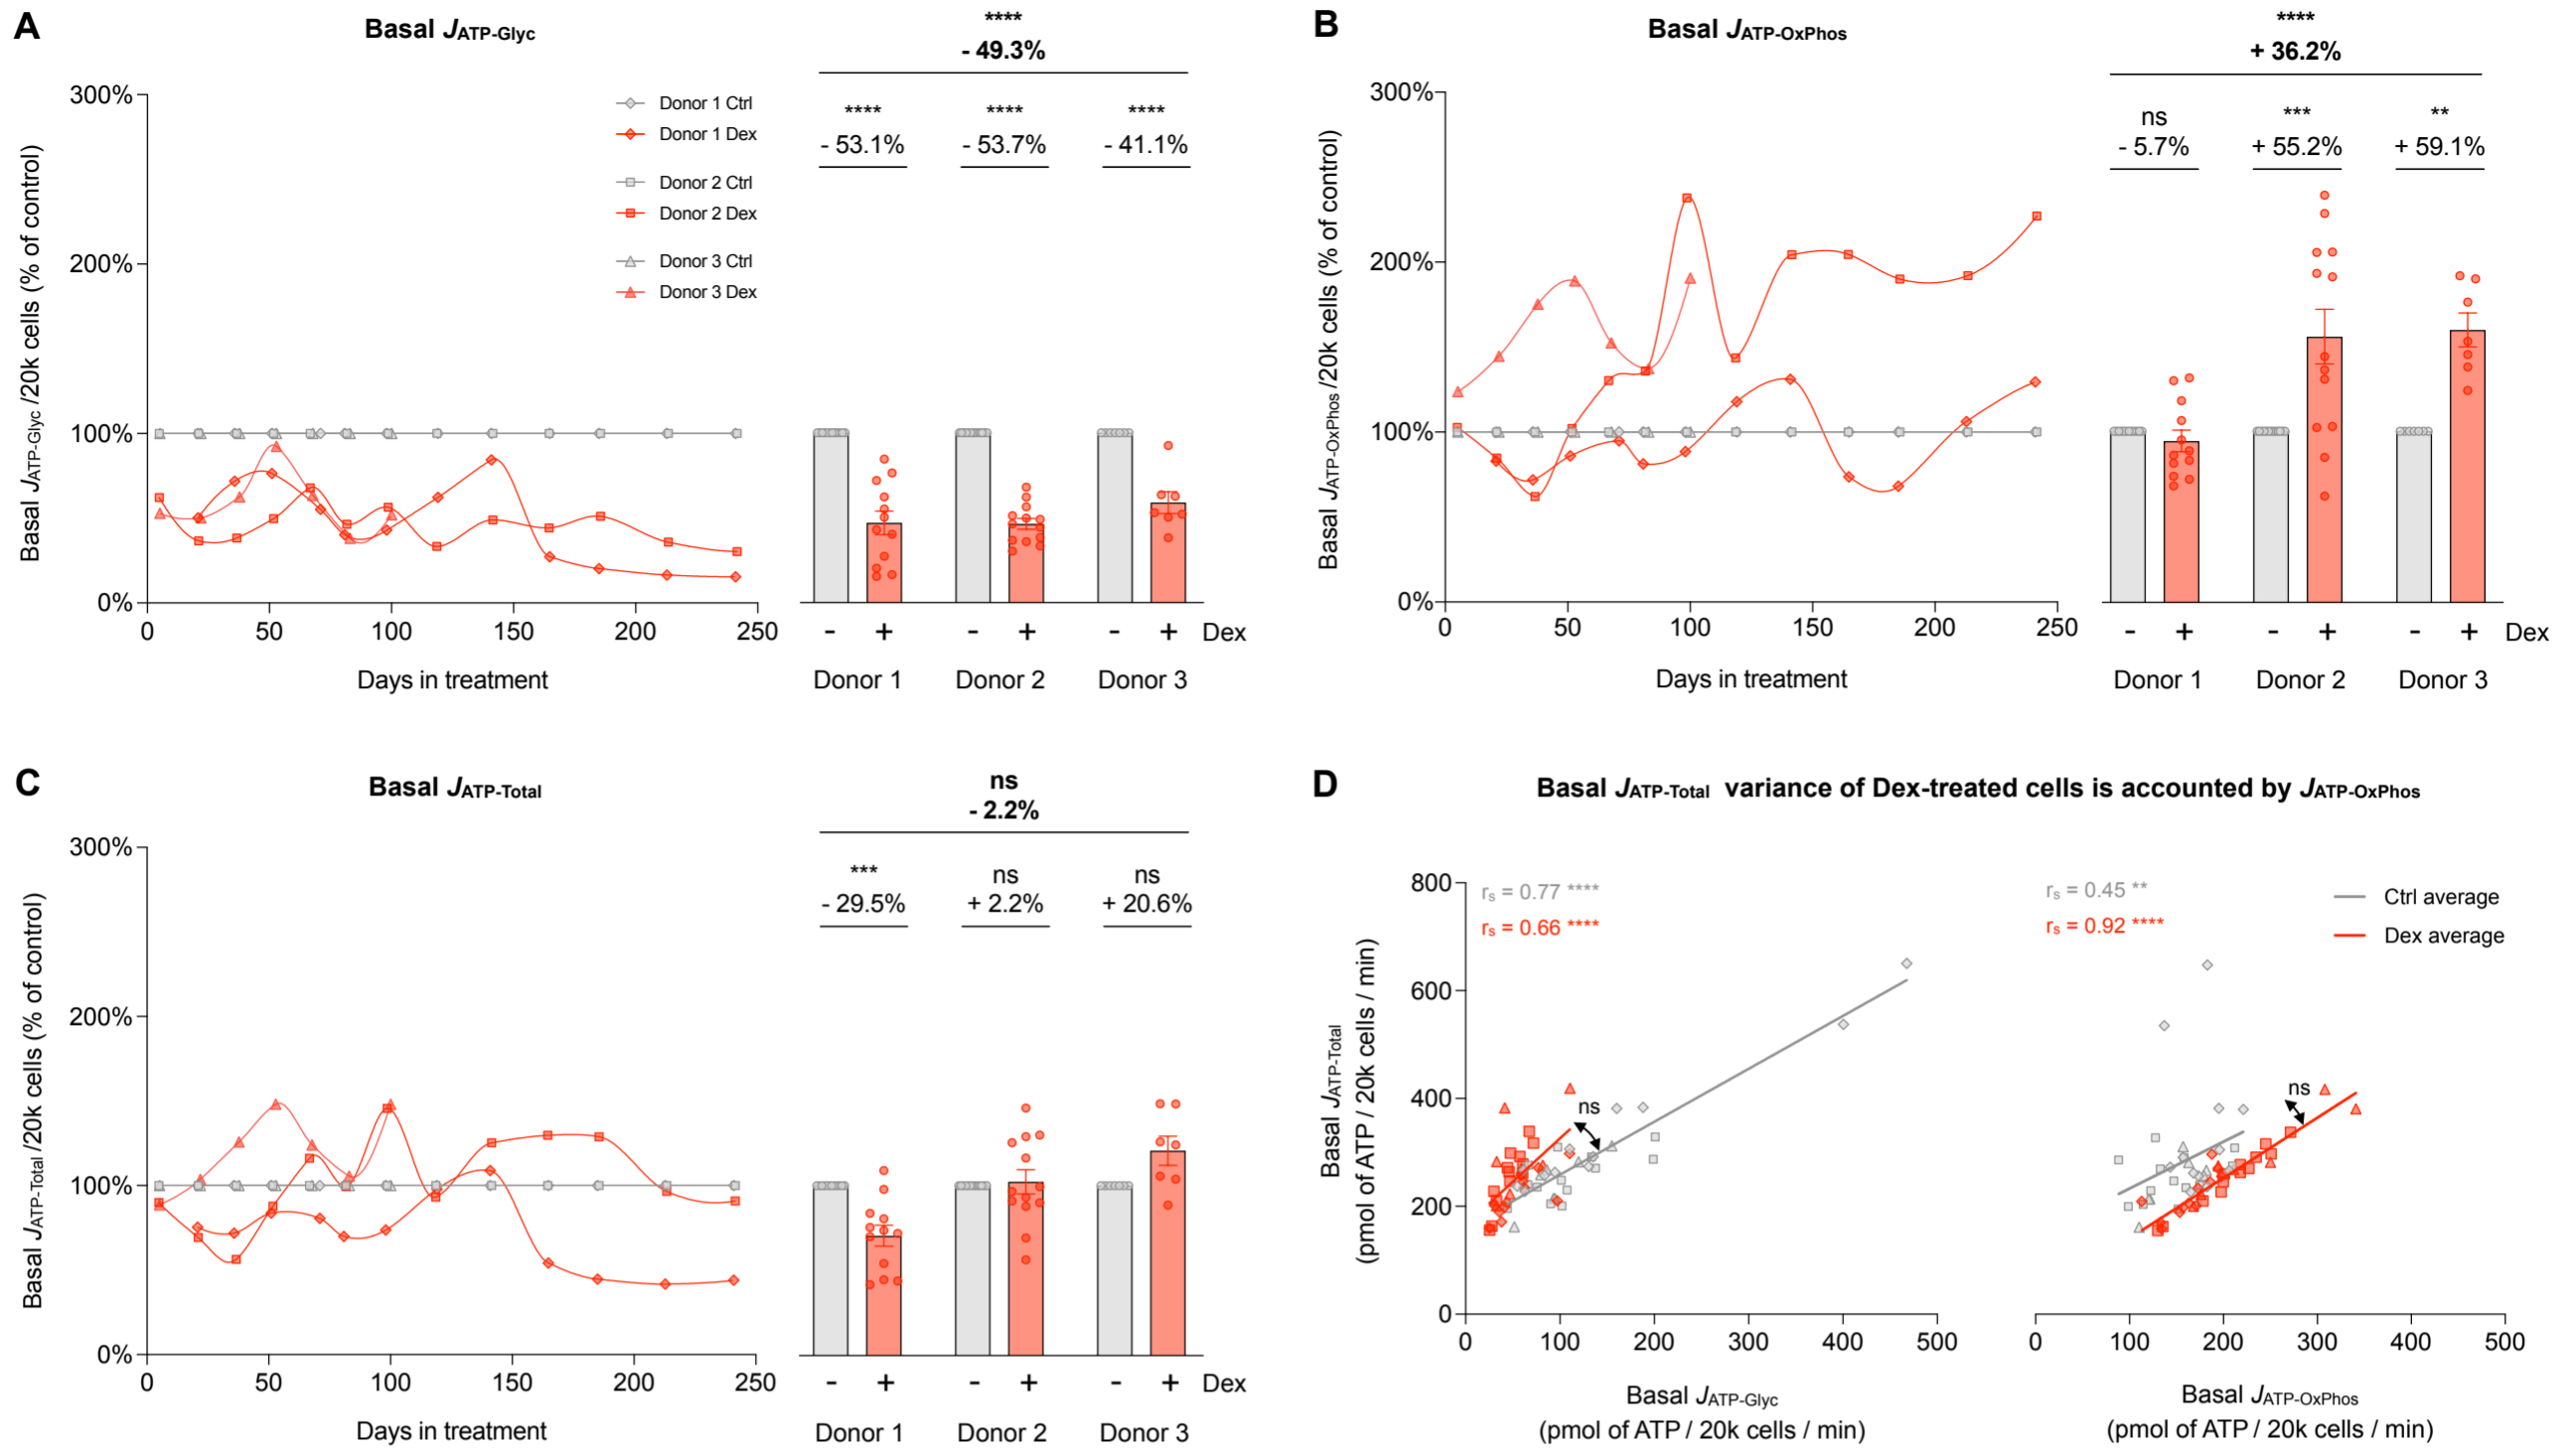

Figure S3

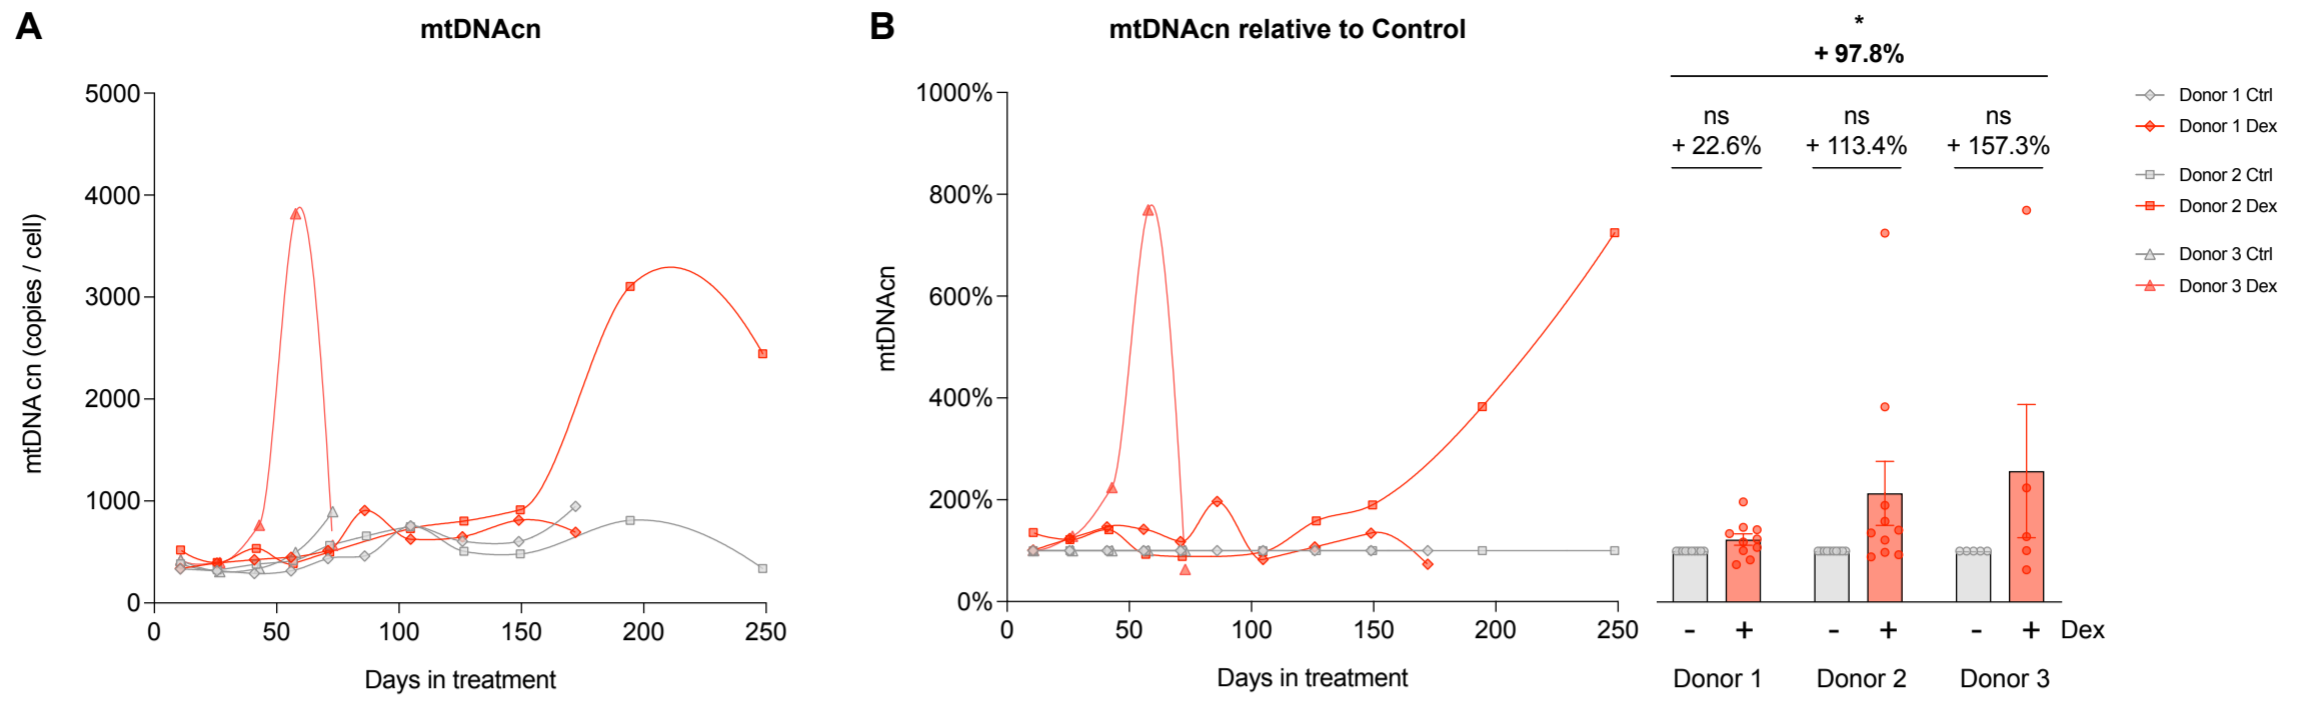

**Figure S4**

**A Glycolysis**

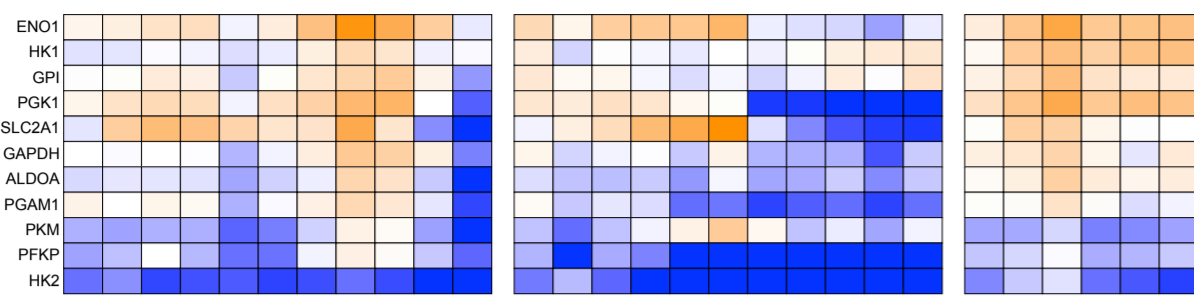

**B OxPhos**

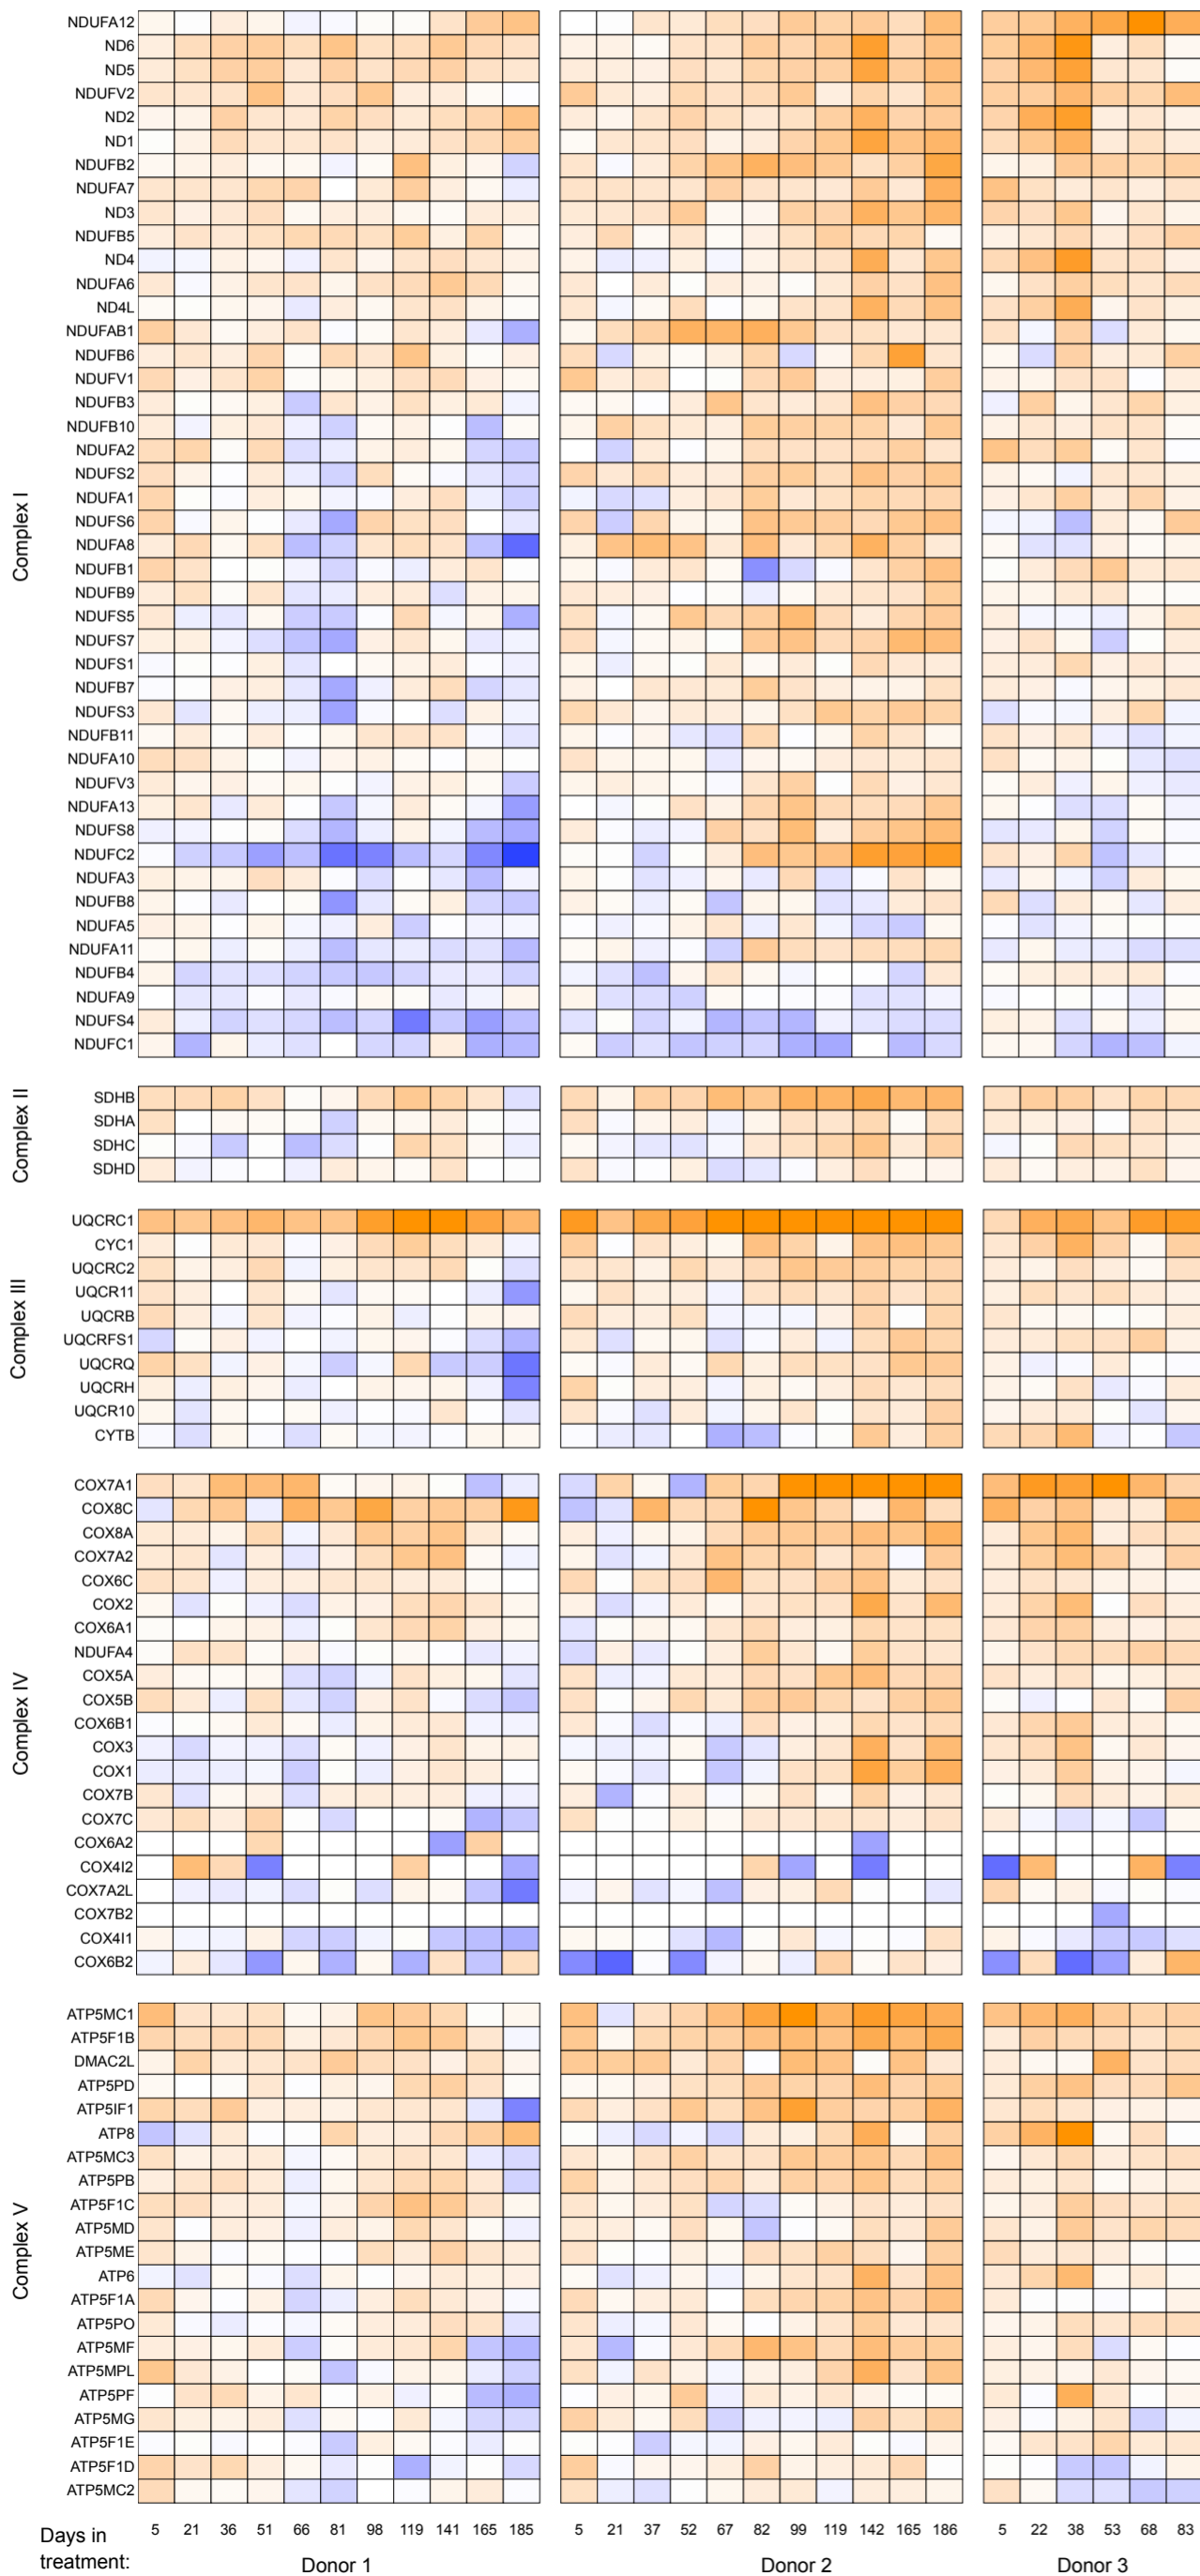

**C mtDNA maintenance**

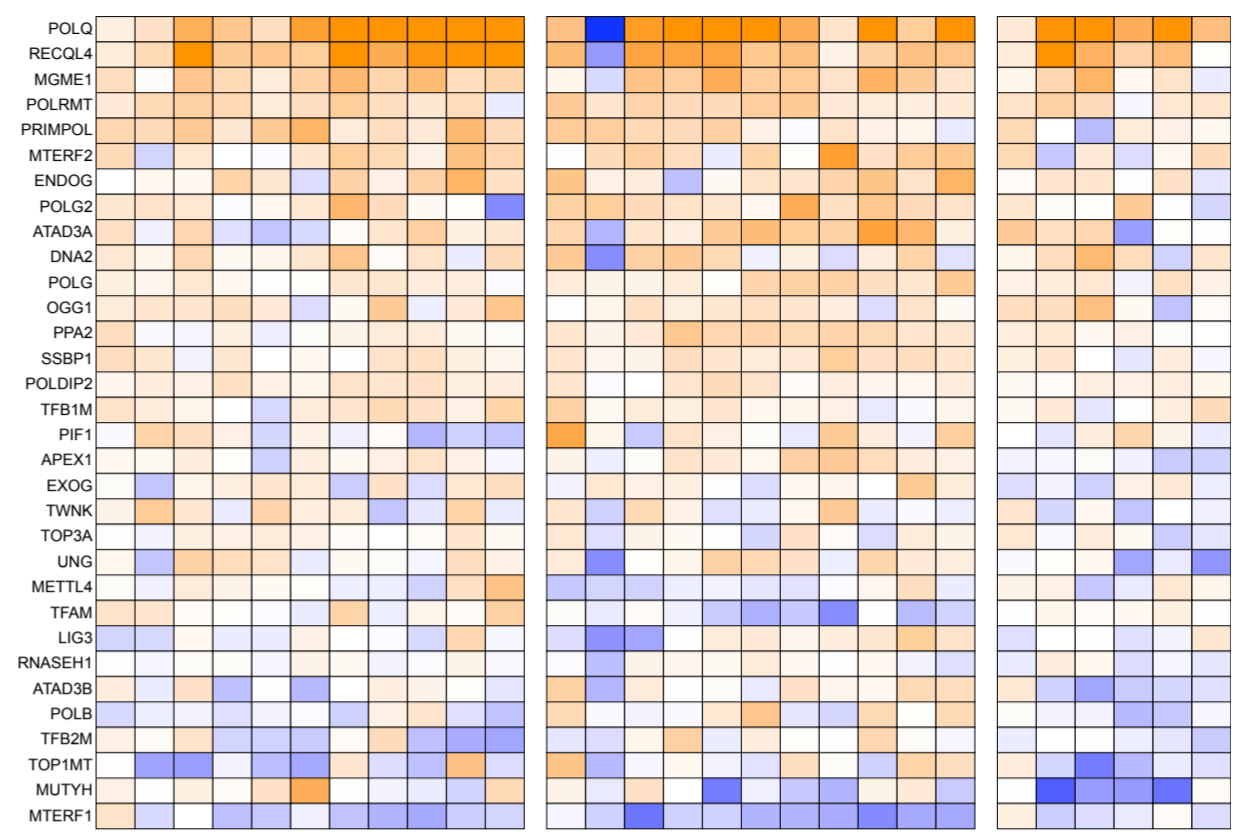

**D mtDNA replication**

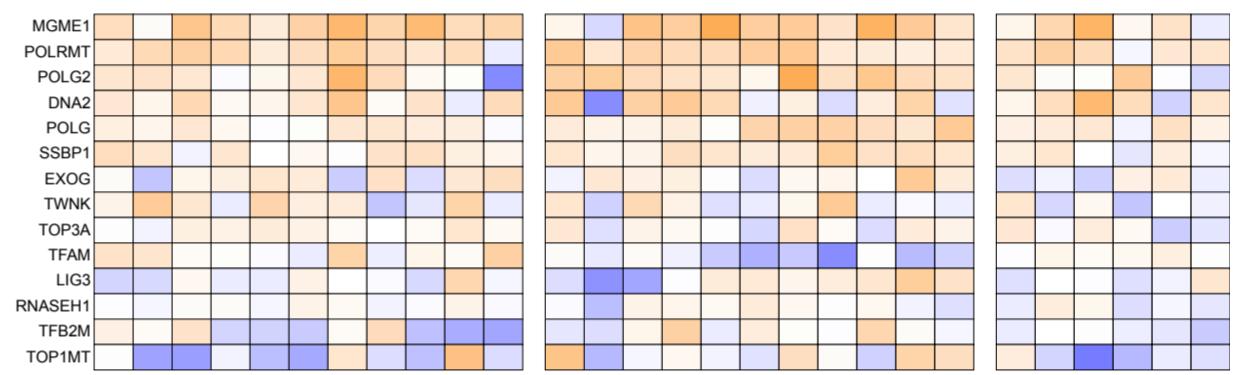

**E Mitochondrial biogenesis**

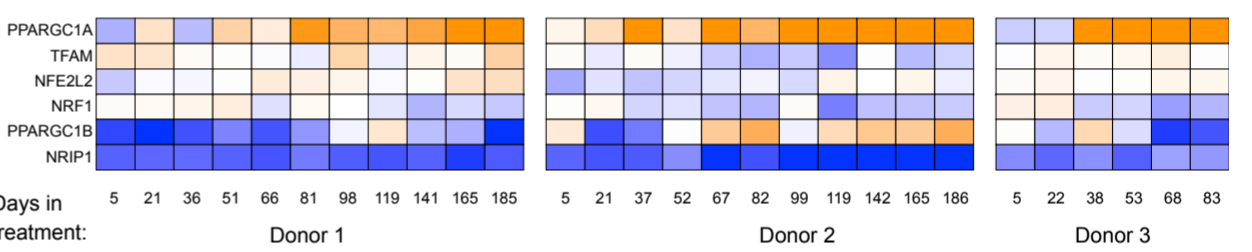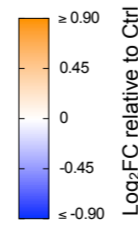

Figure S5

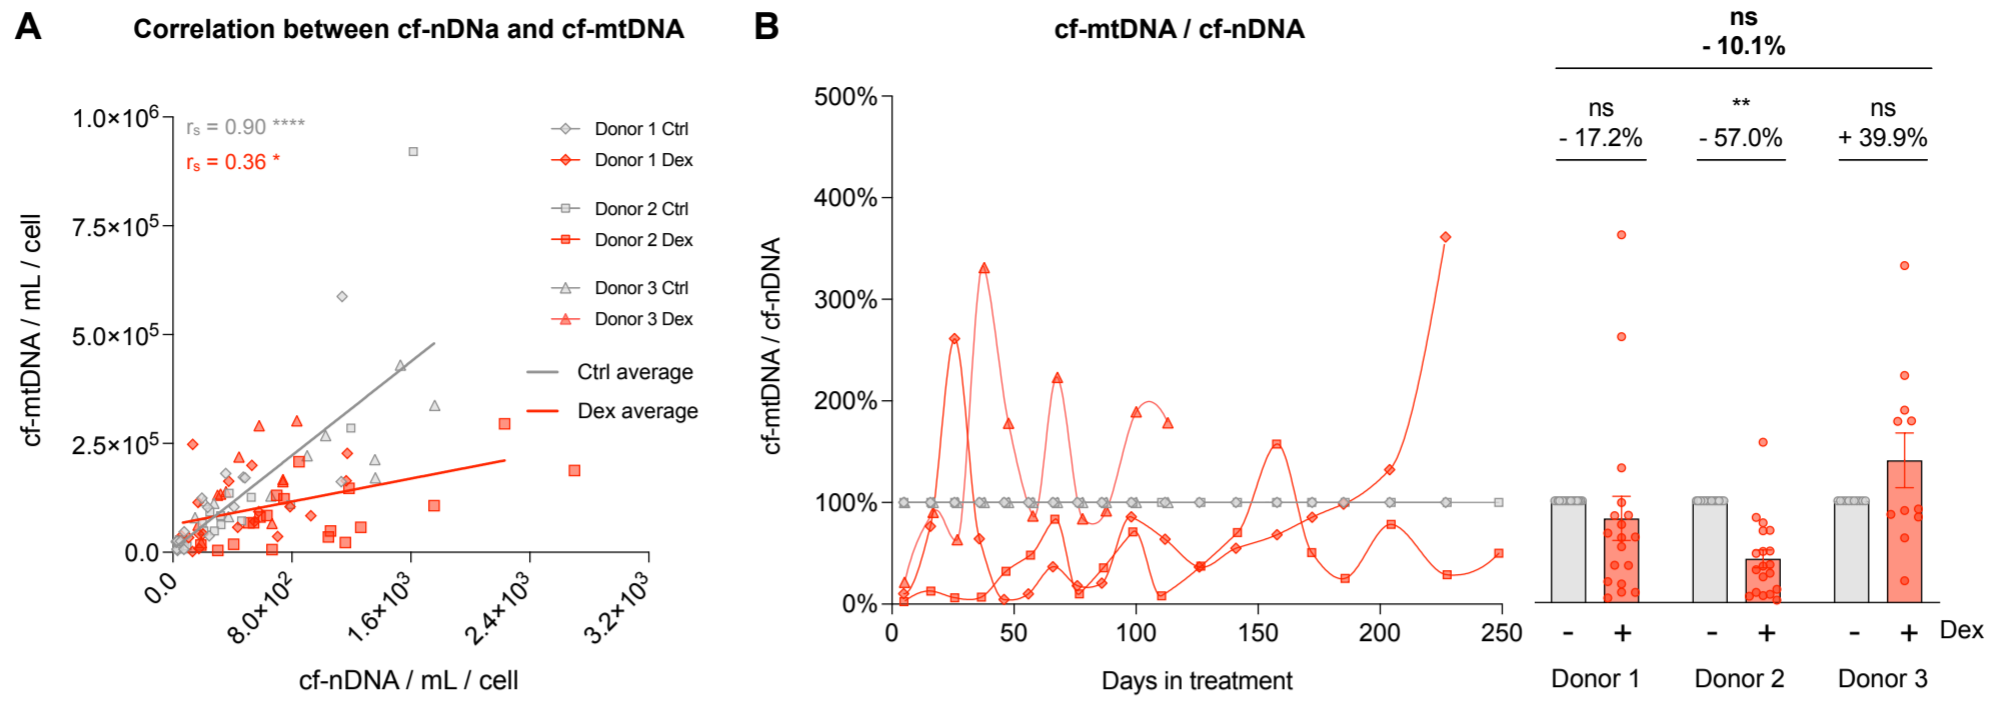

Figure S6

**A**

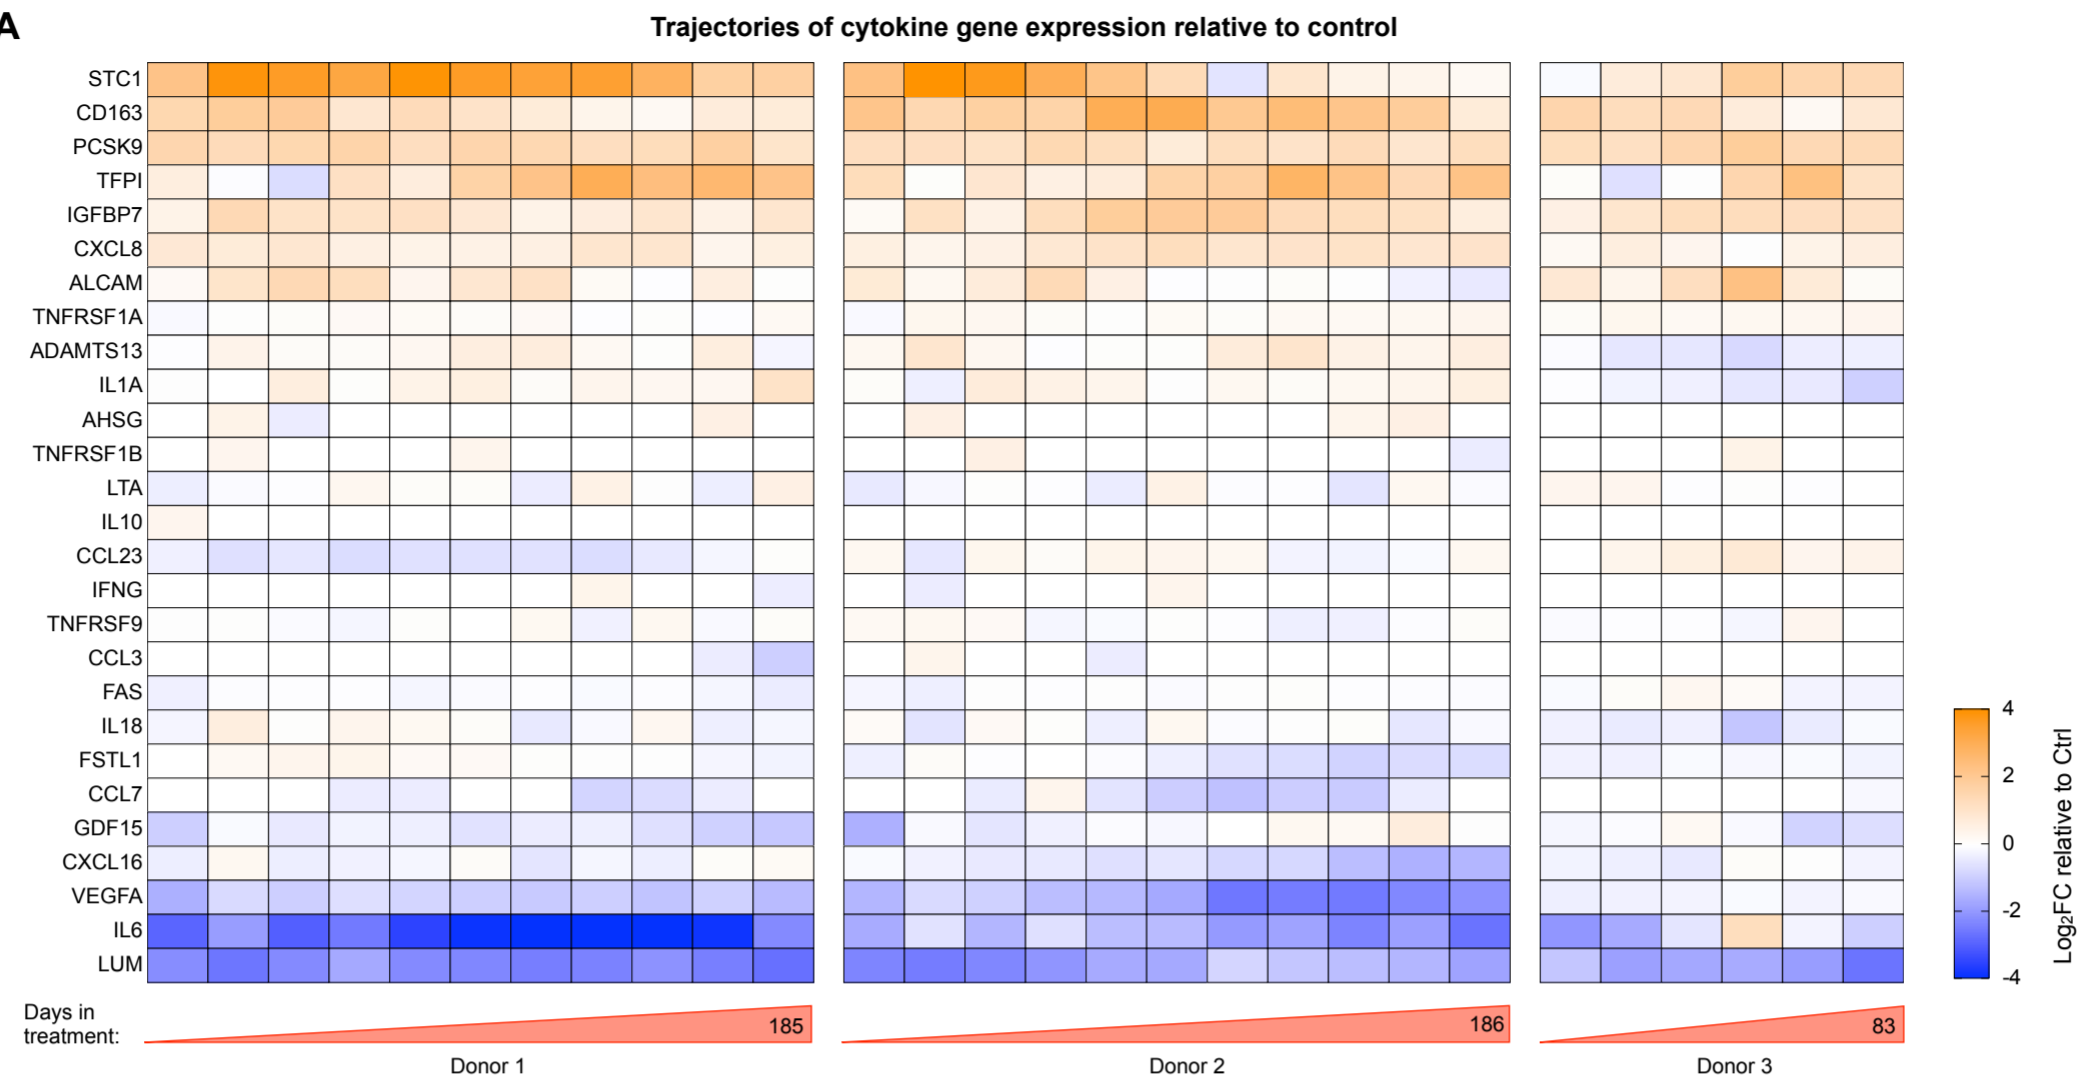

**B**

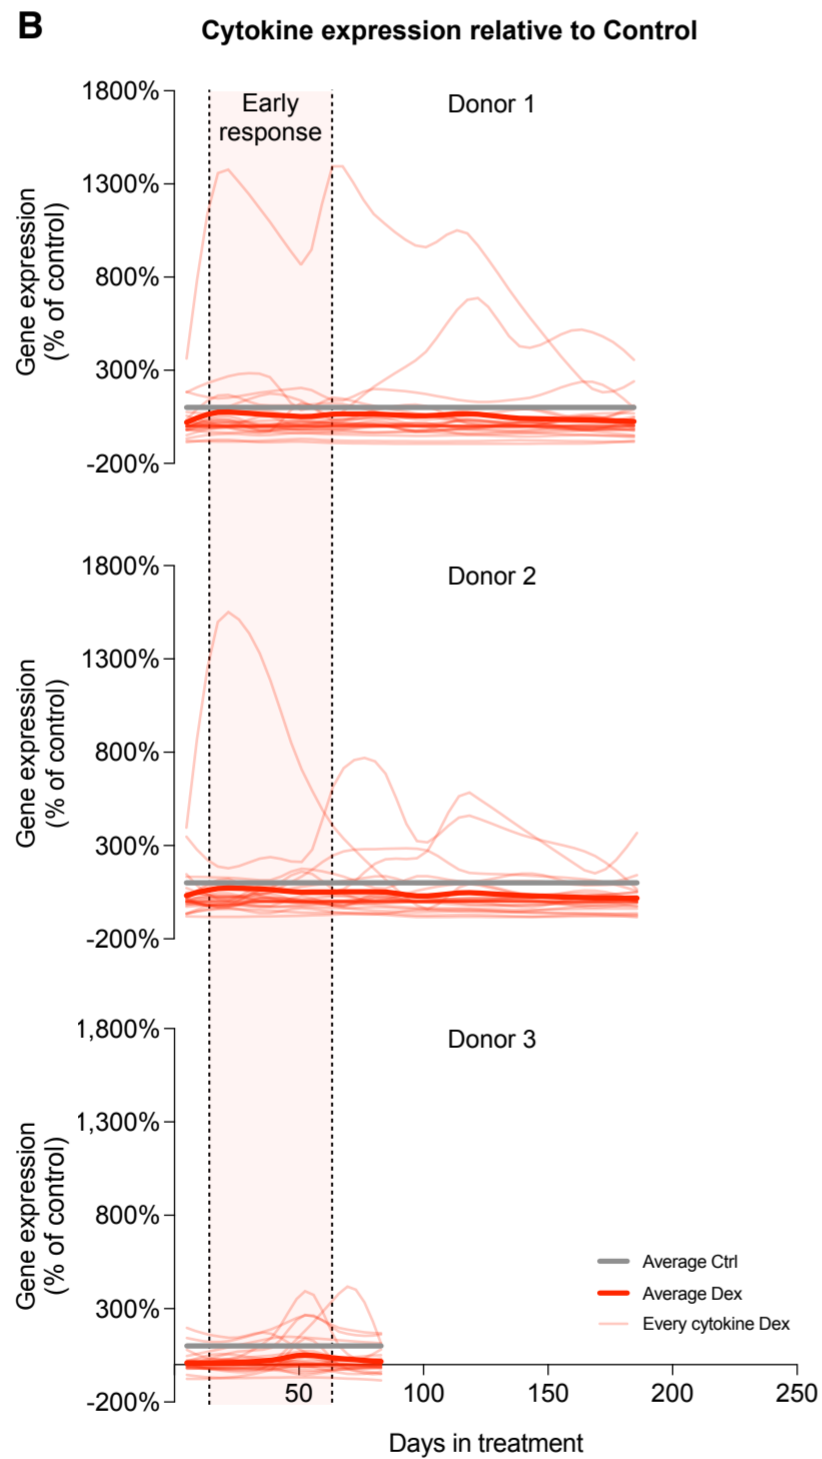

**C**

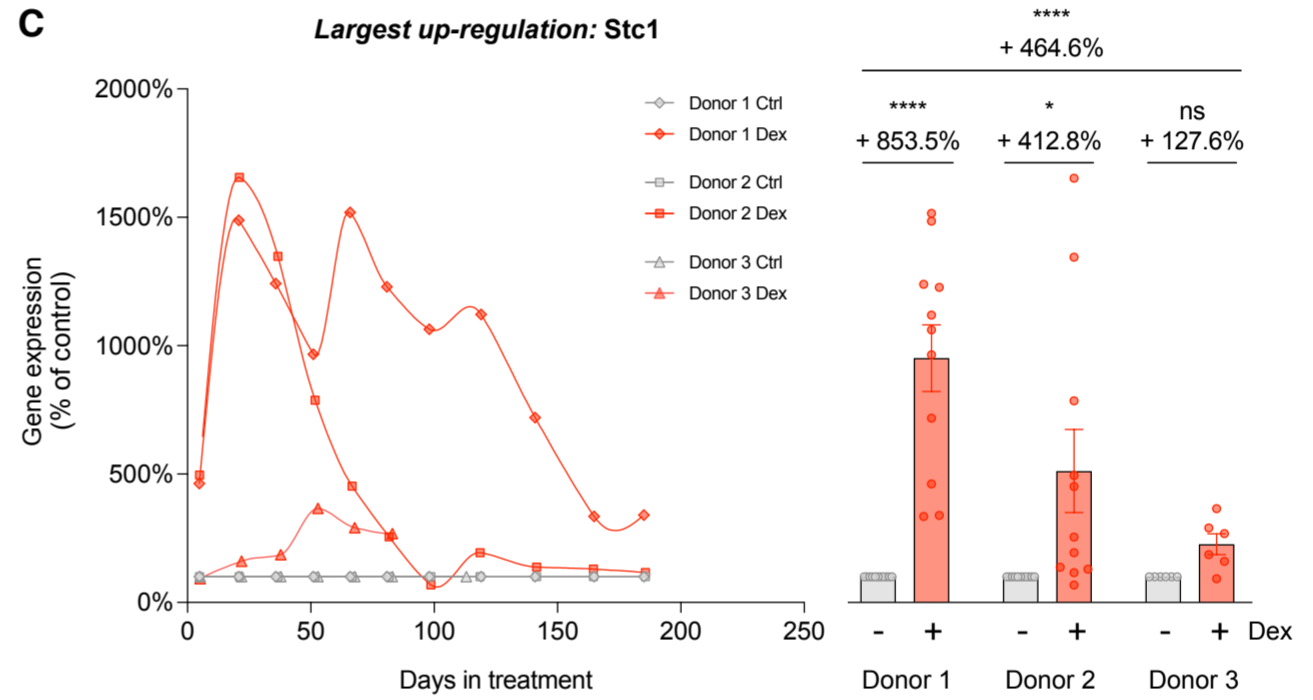

**D**

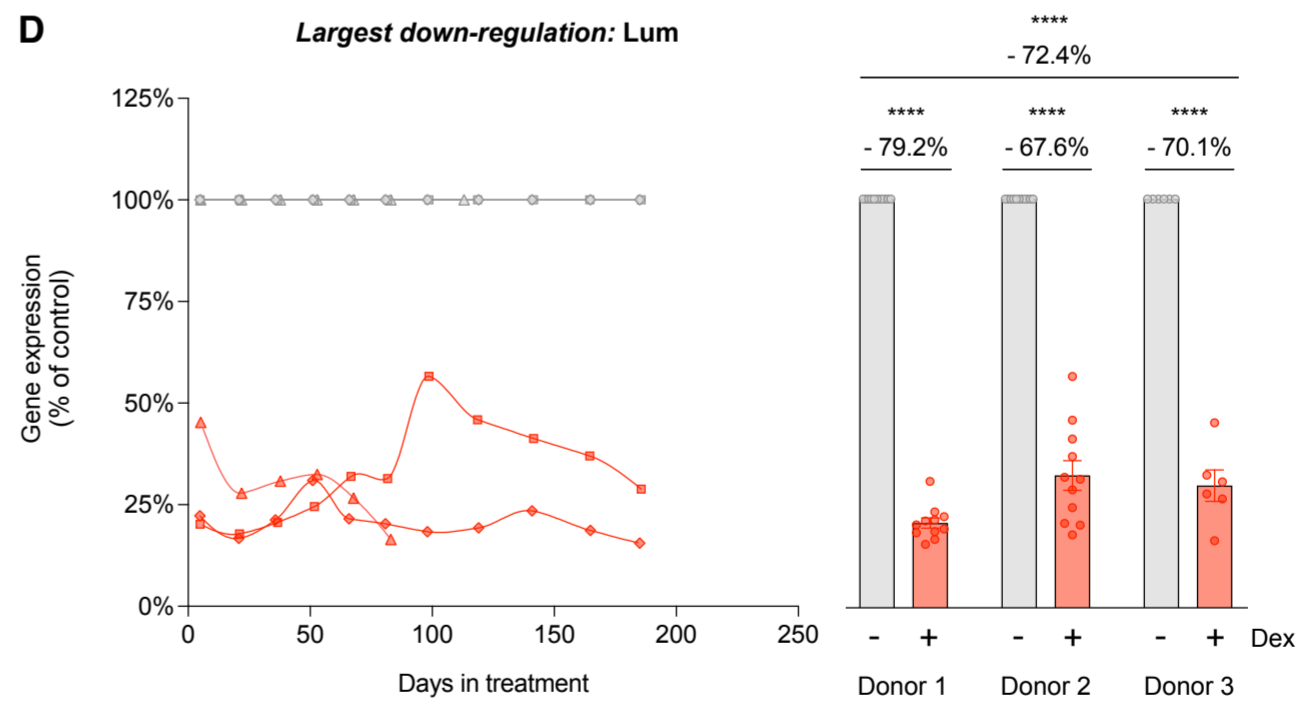

**Figure S7**

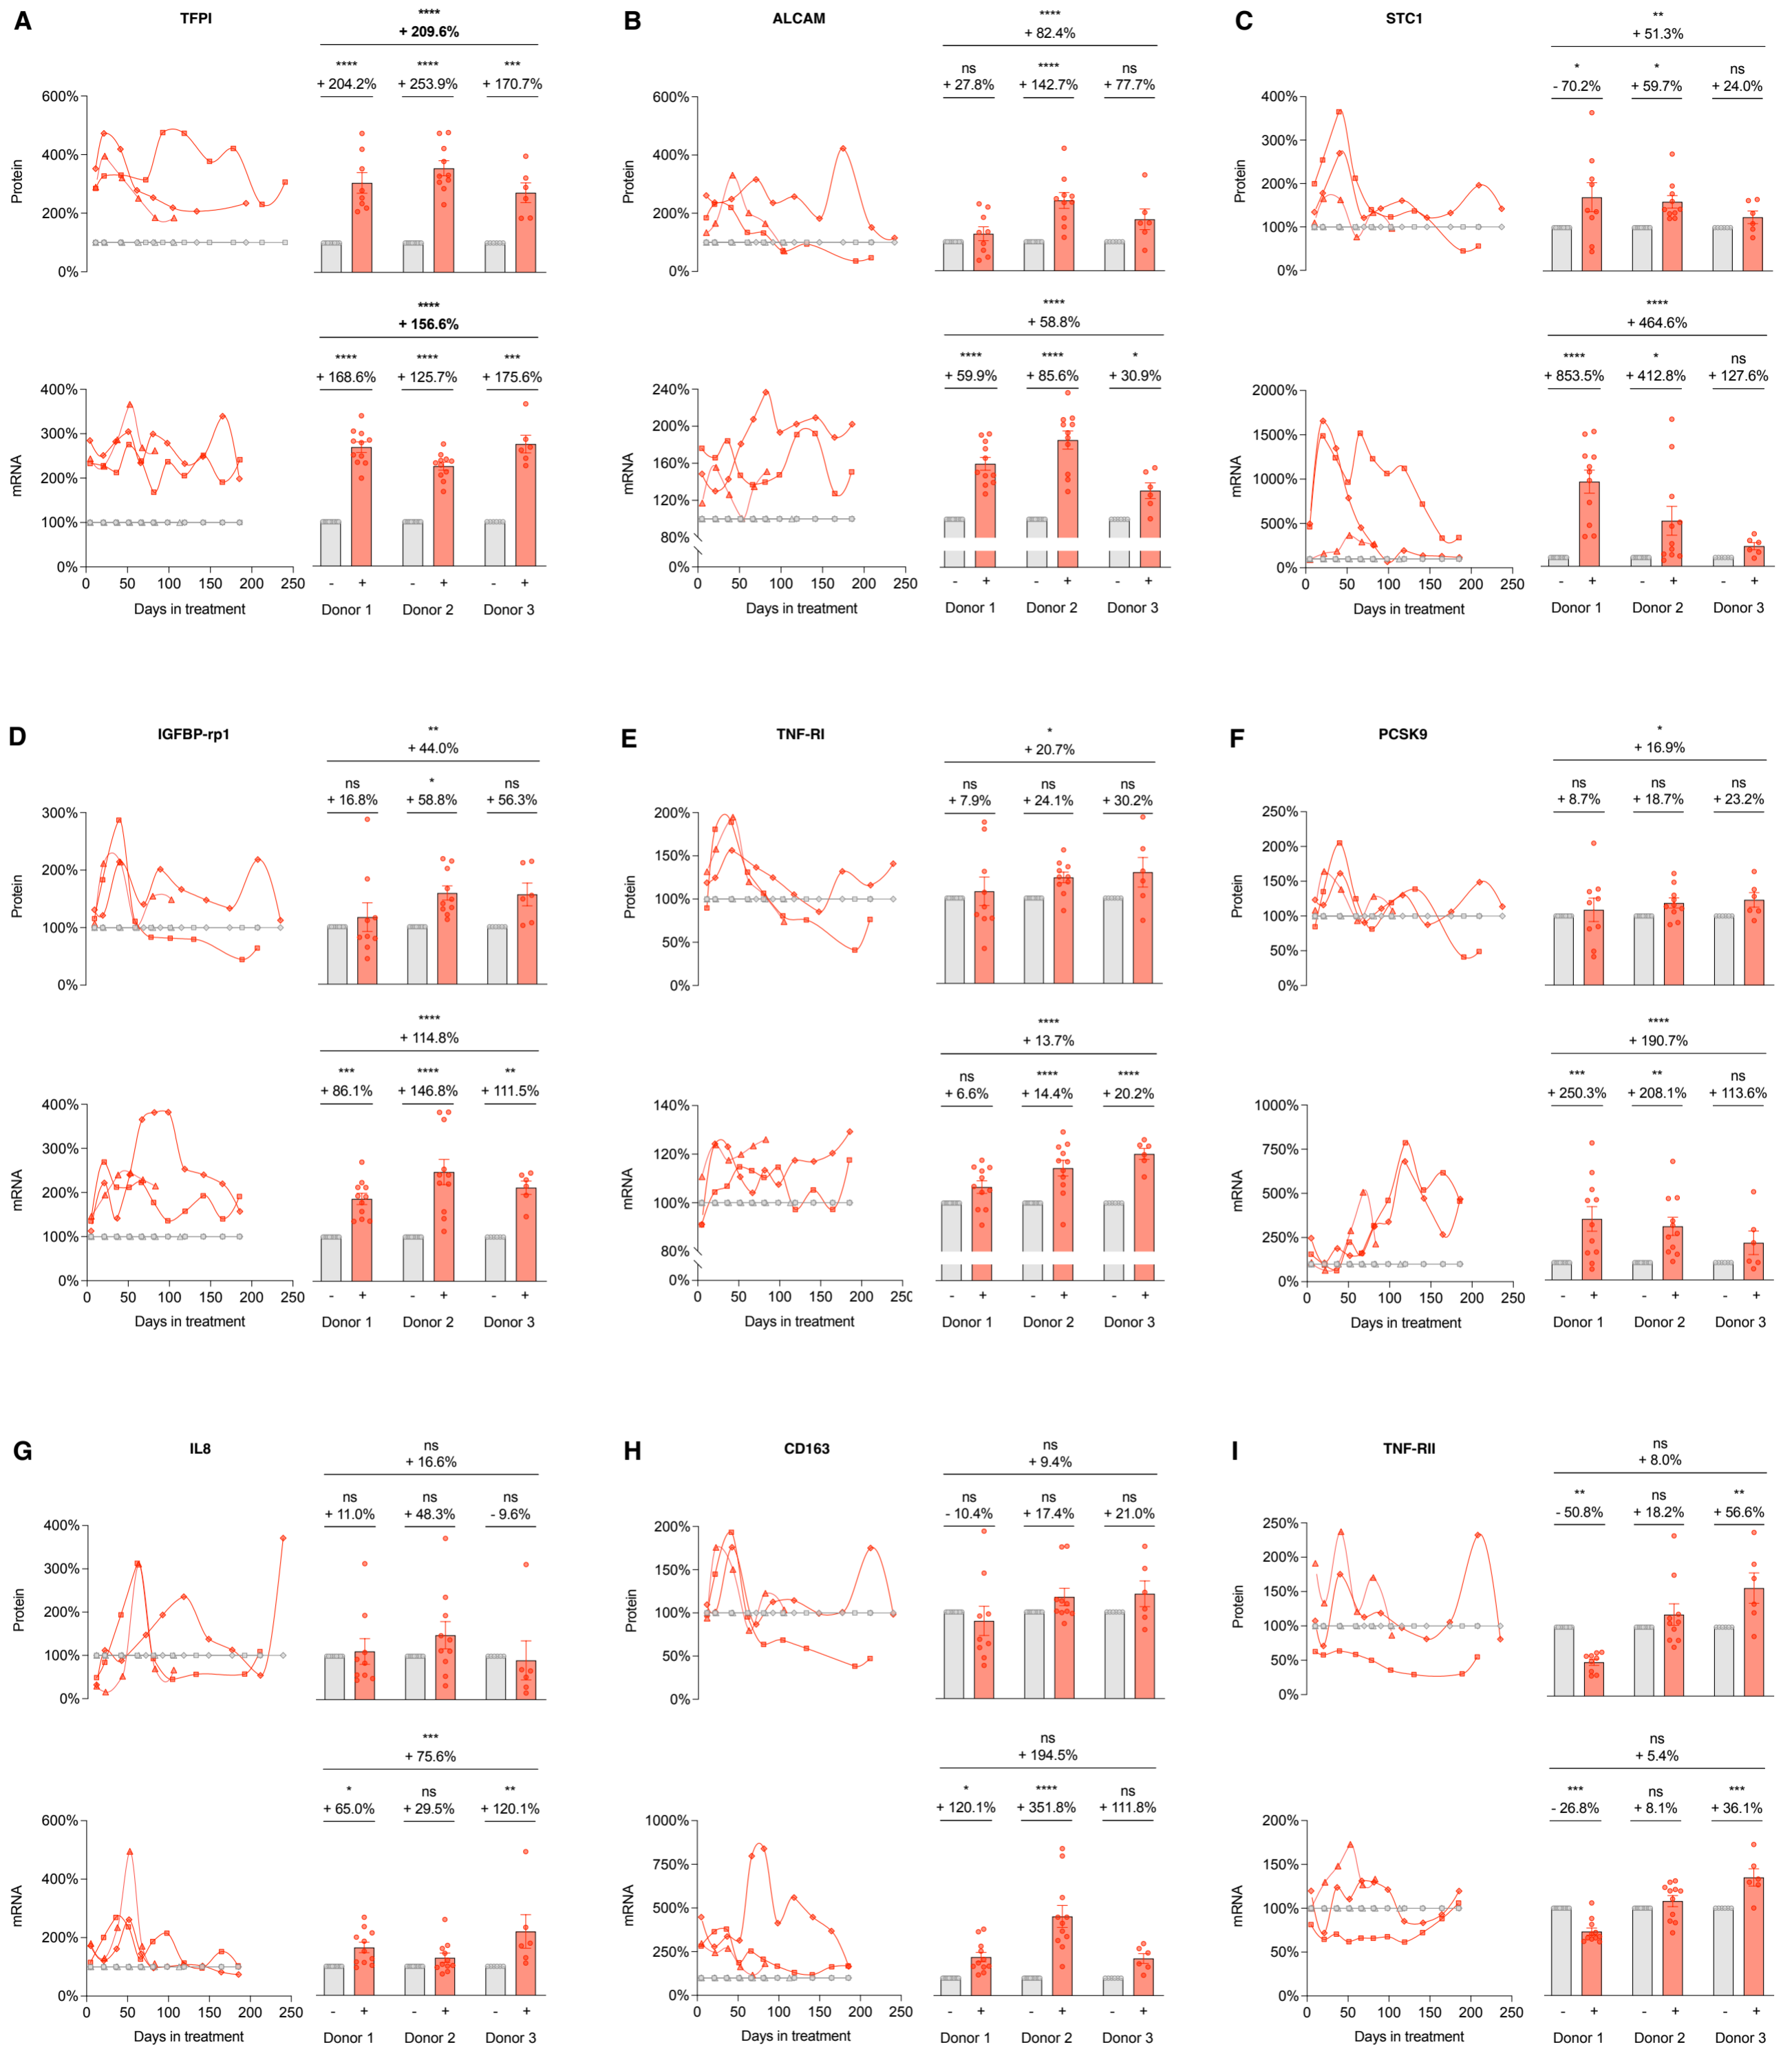

Figure S7 - Continued (2/3)

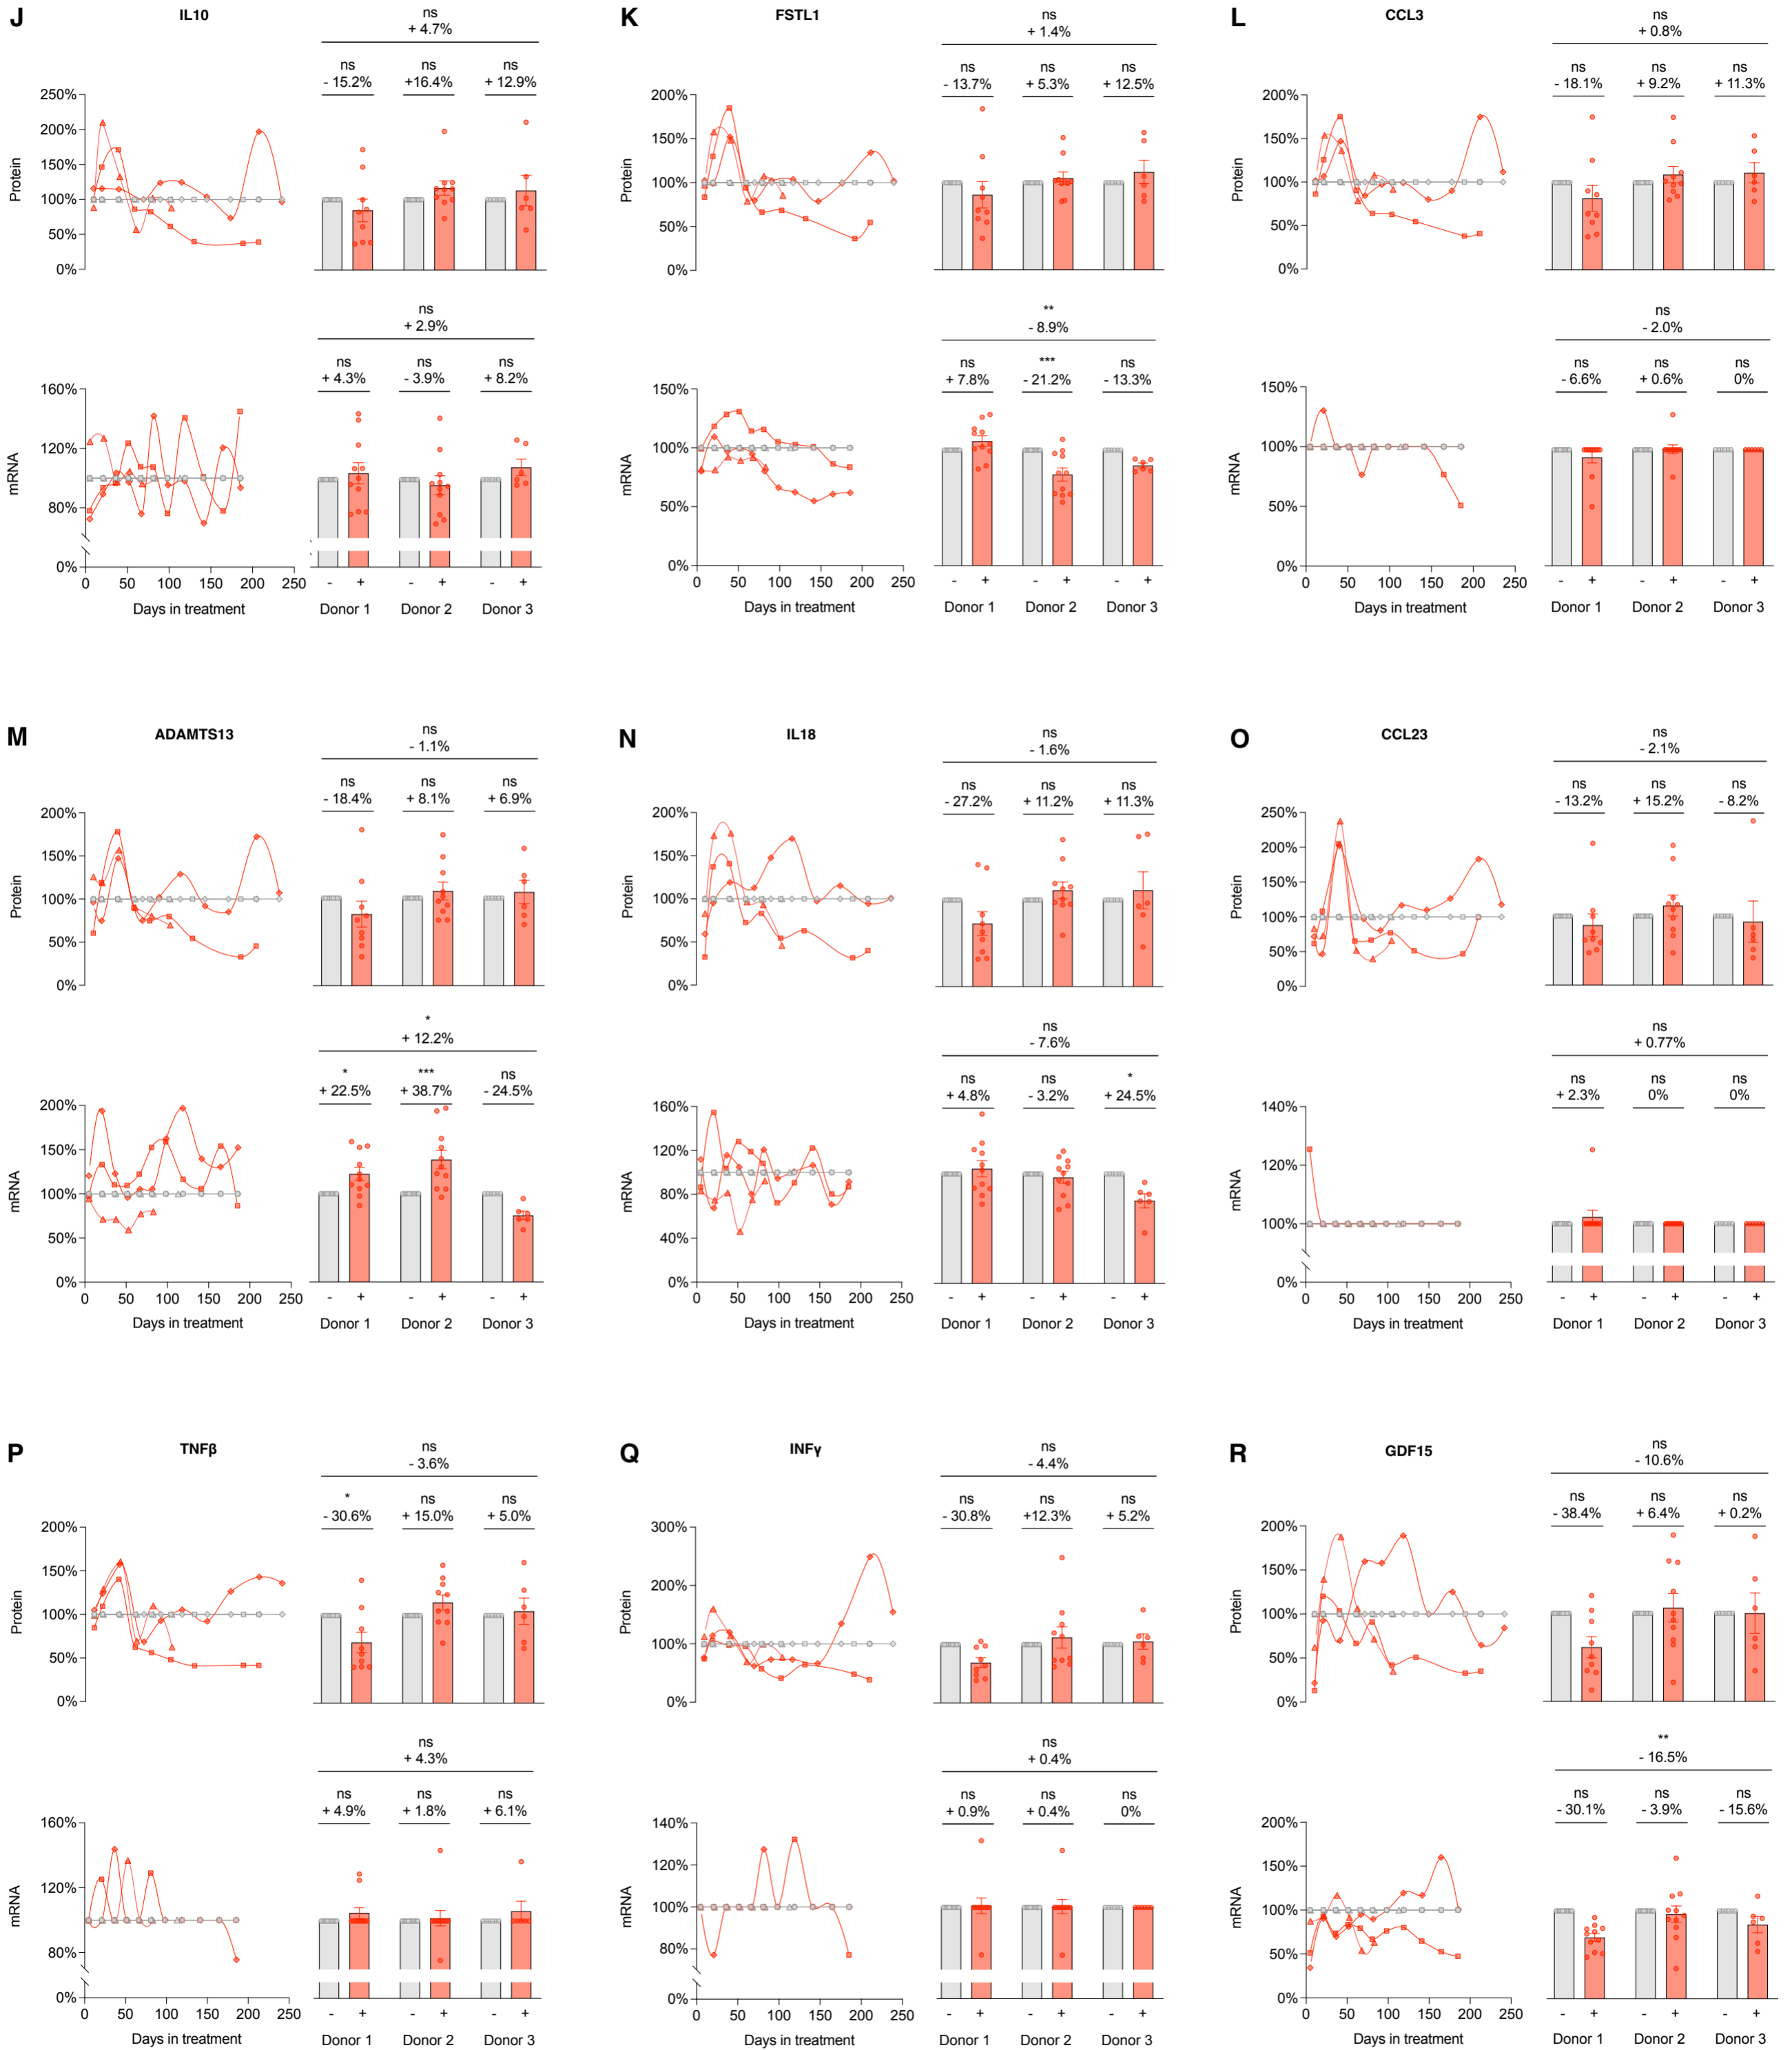



Figure S7 - Continued (3/3)

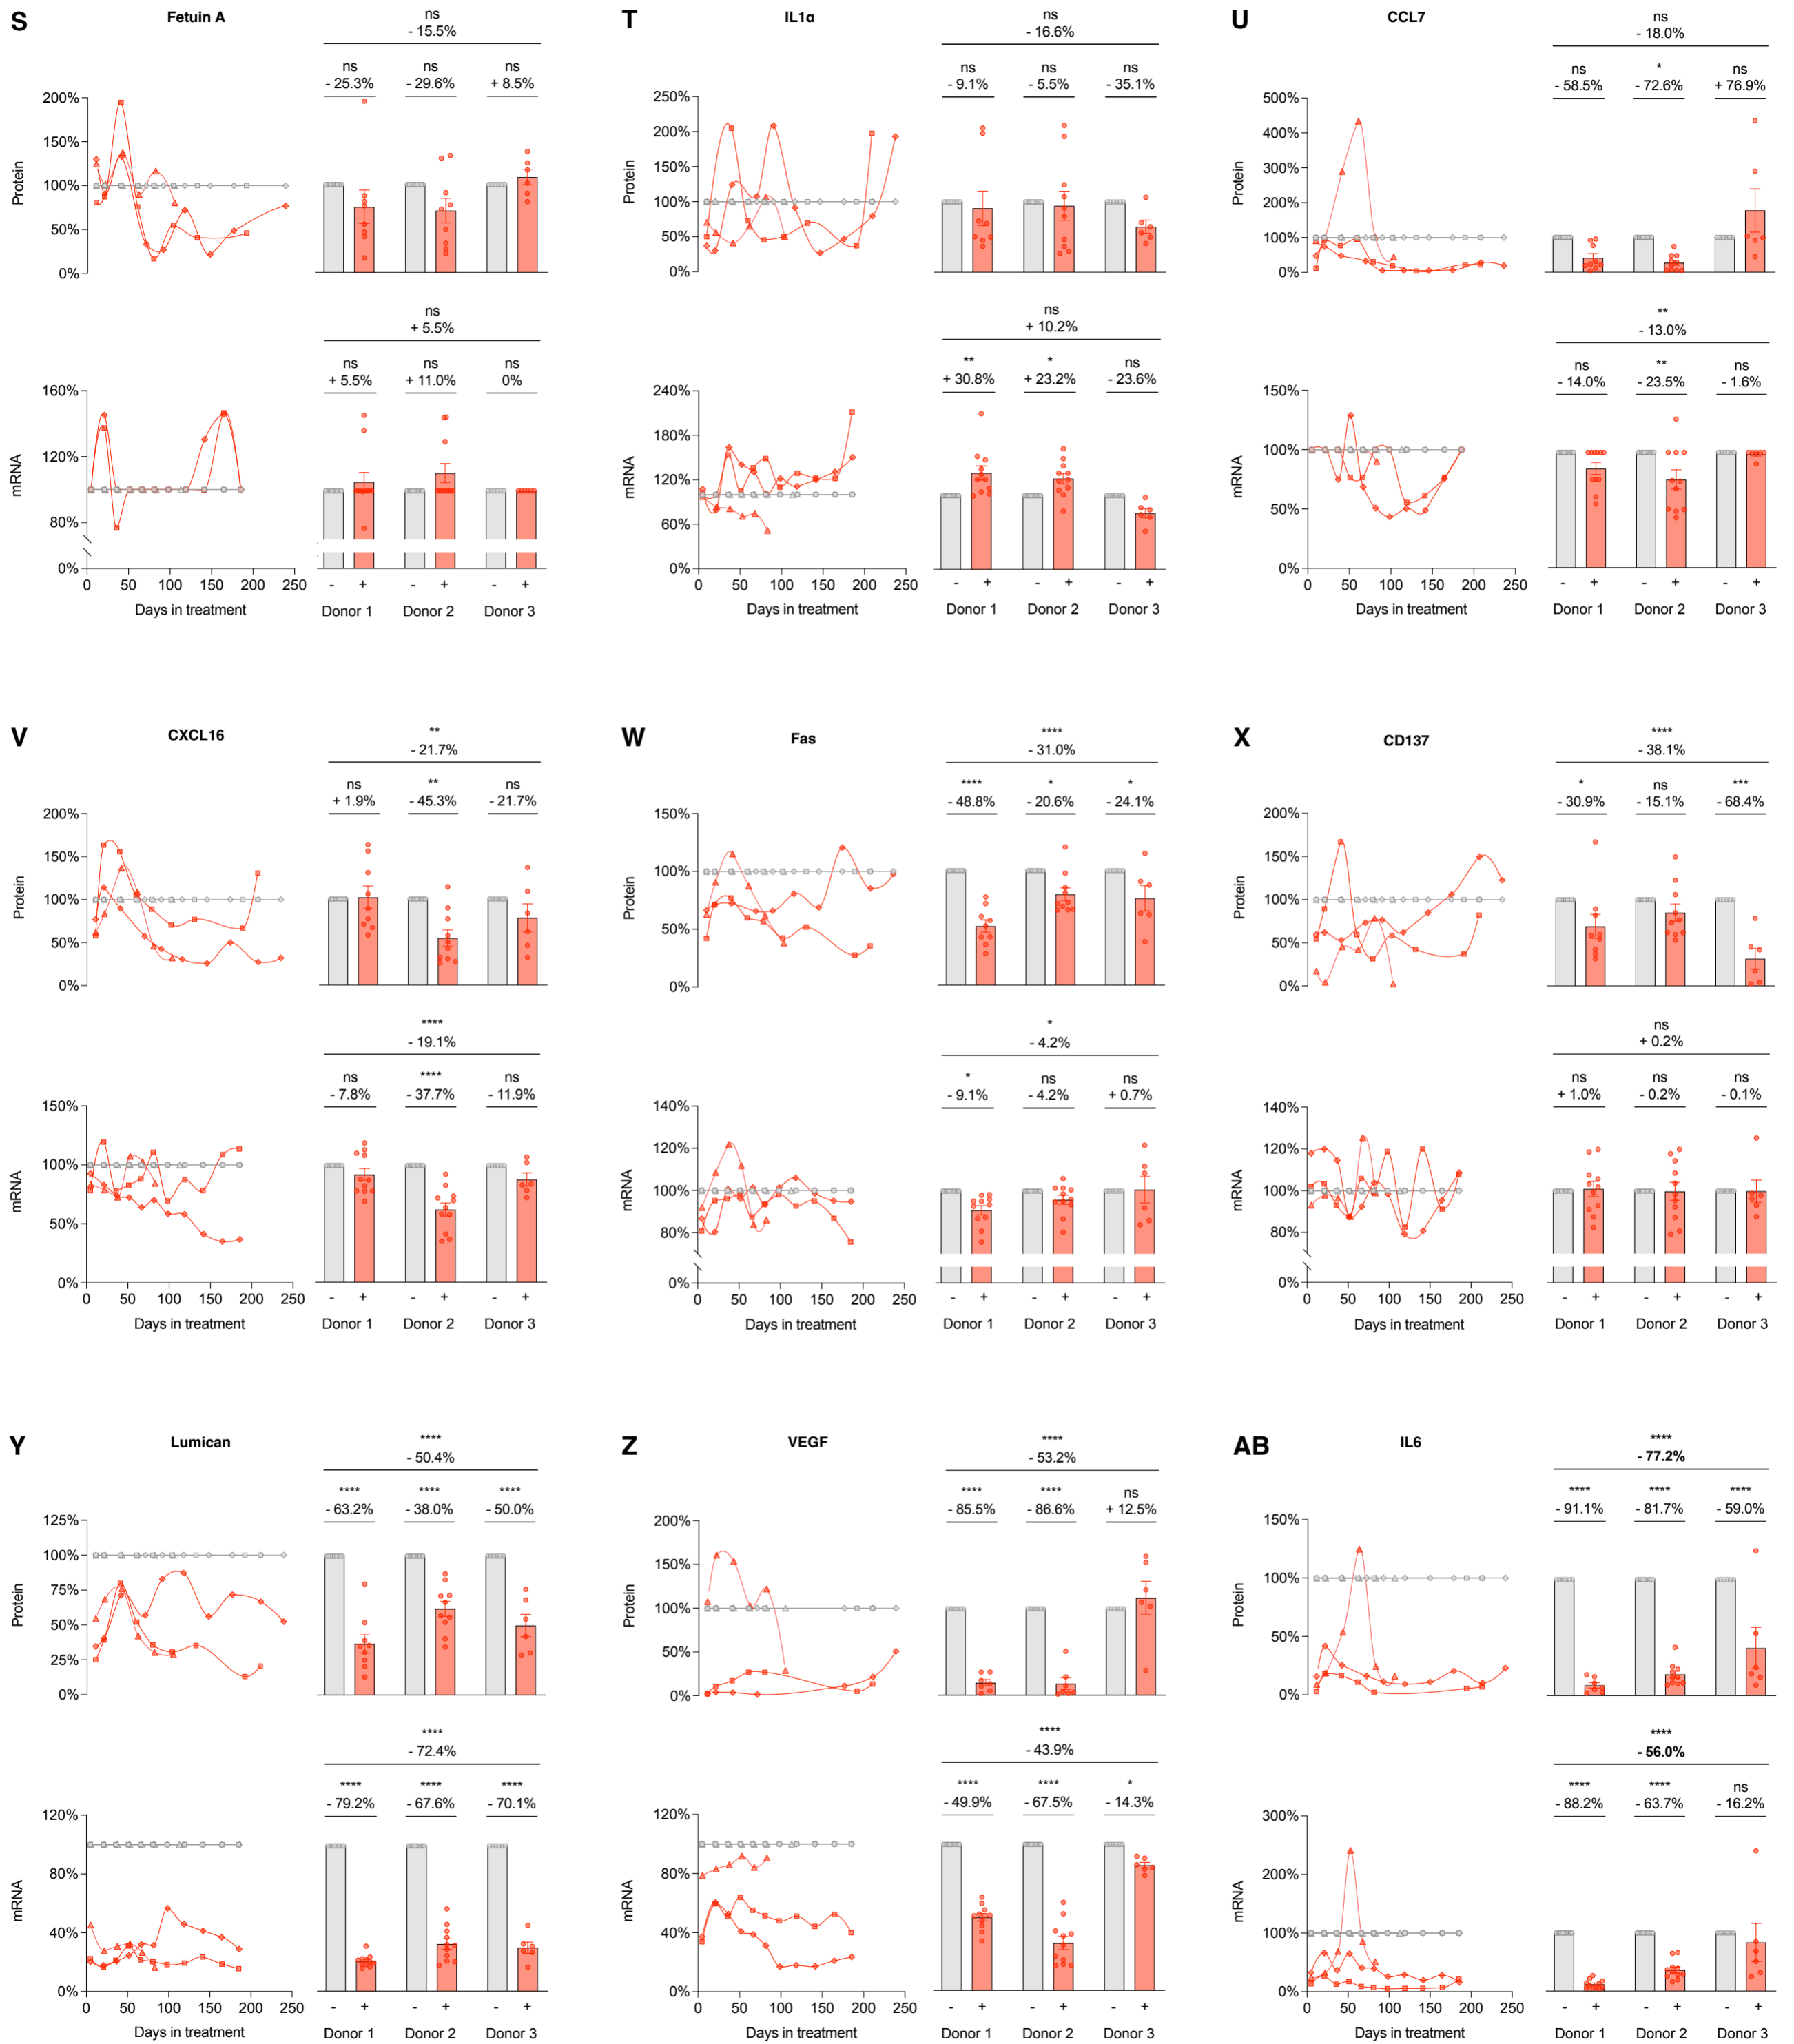

**Figure S8**

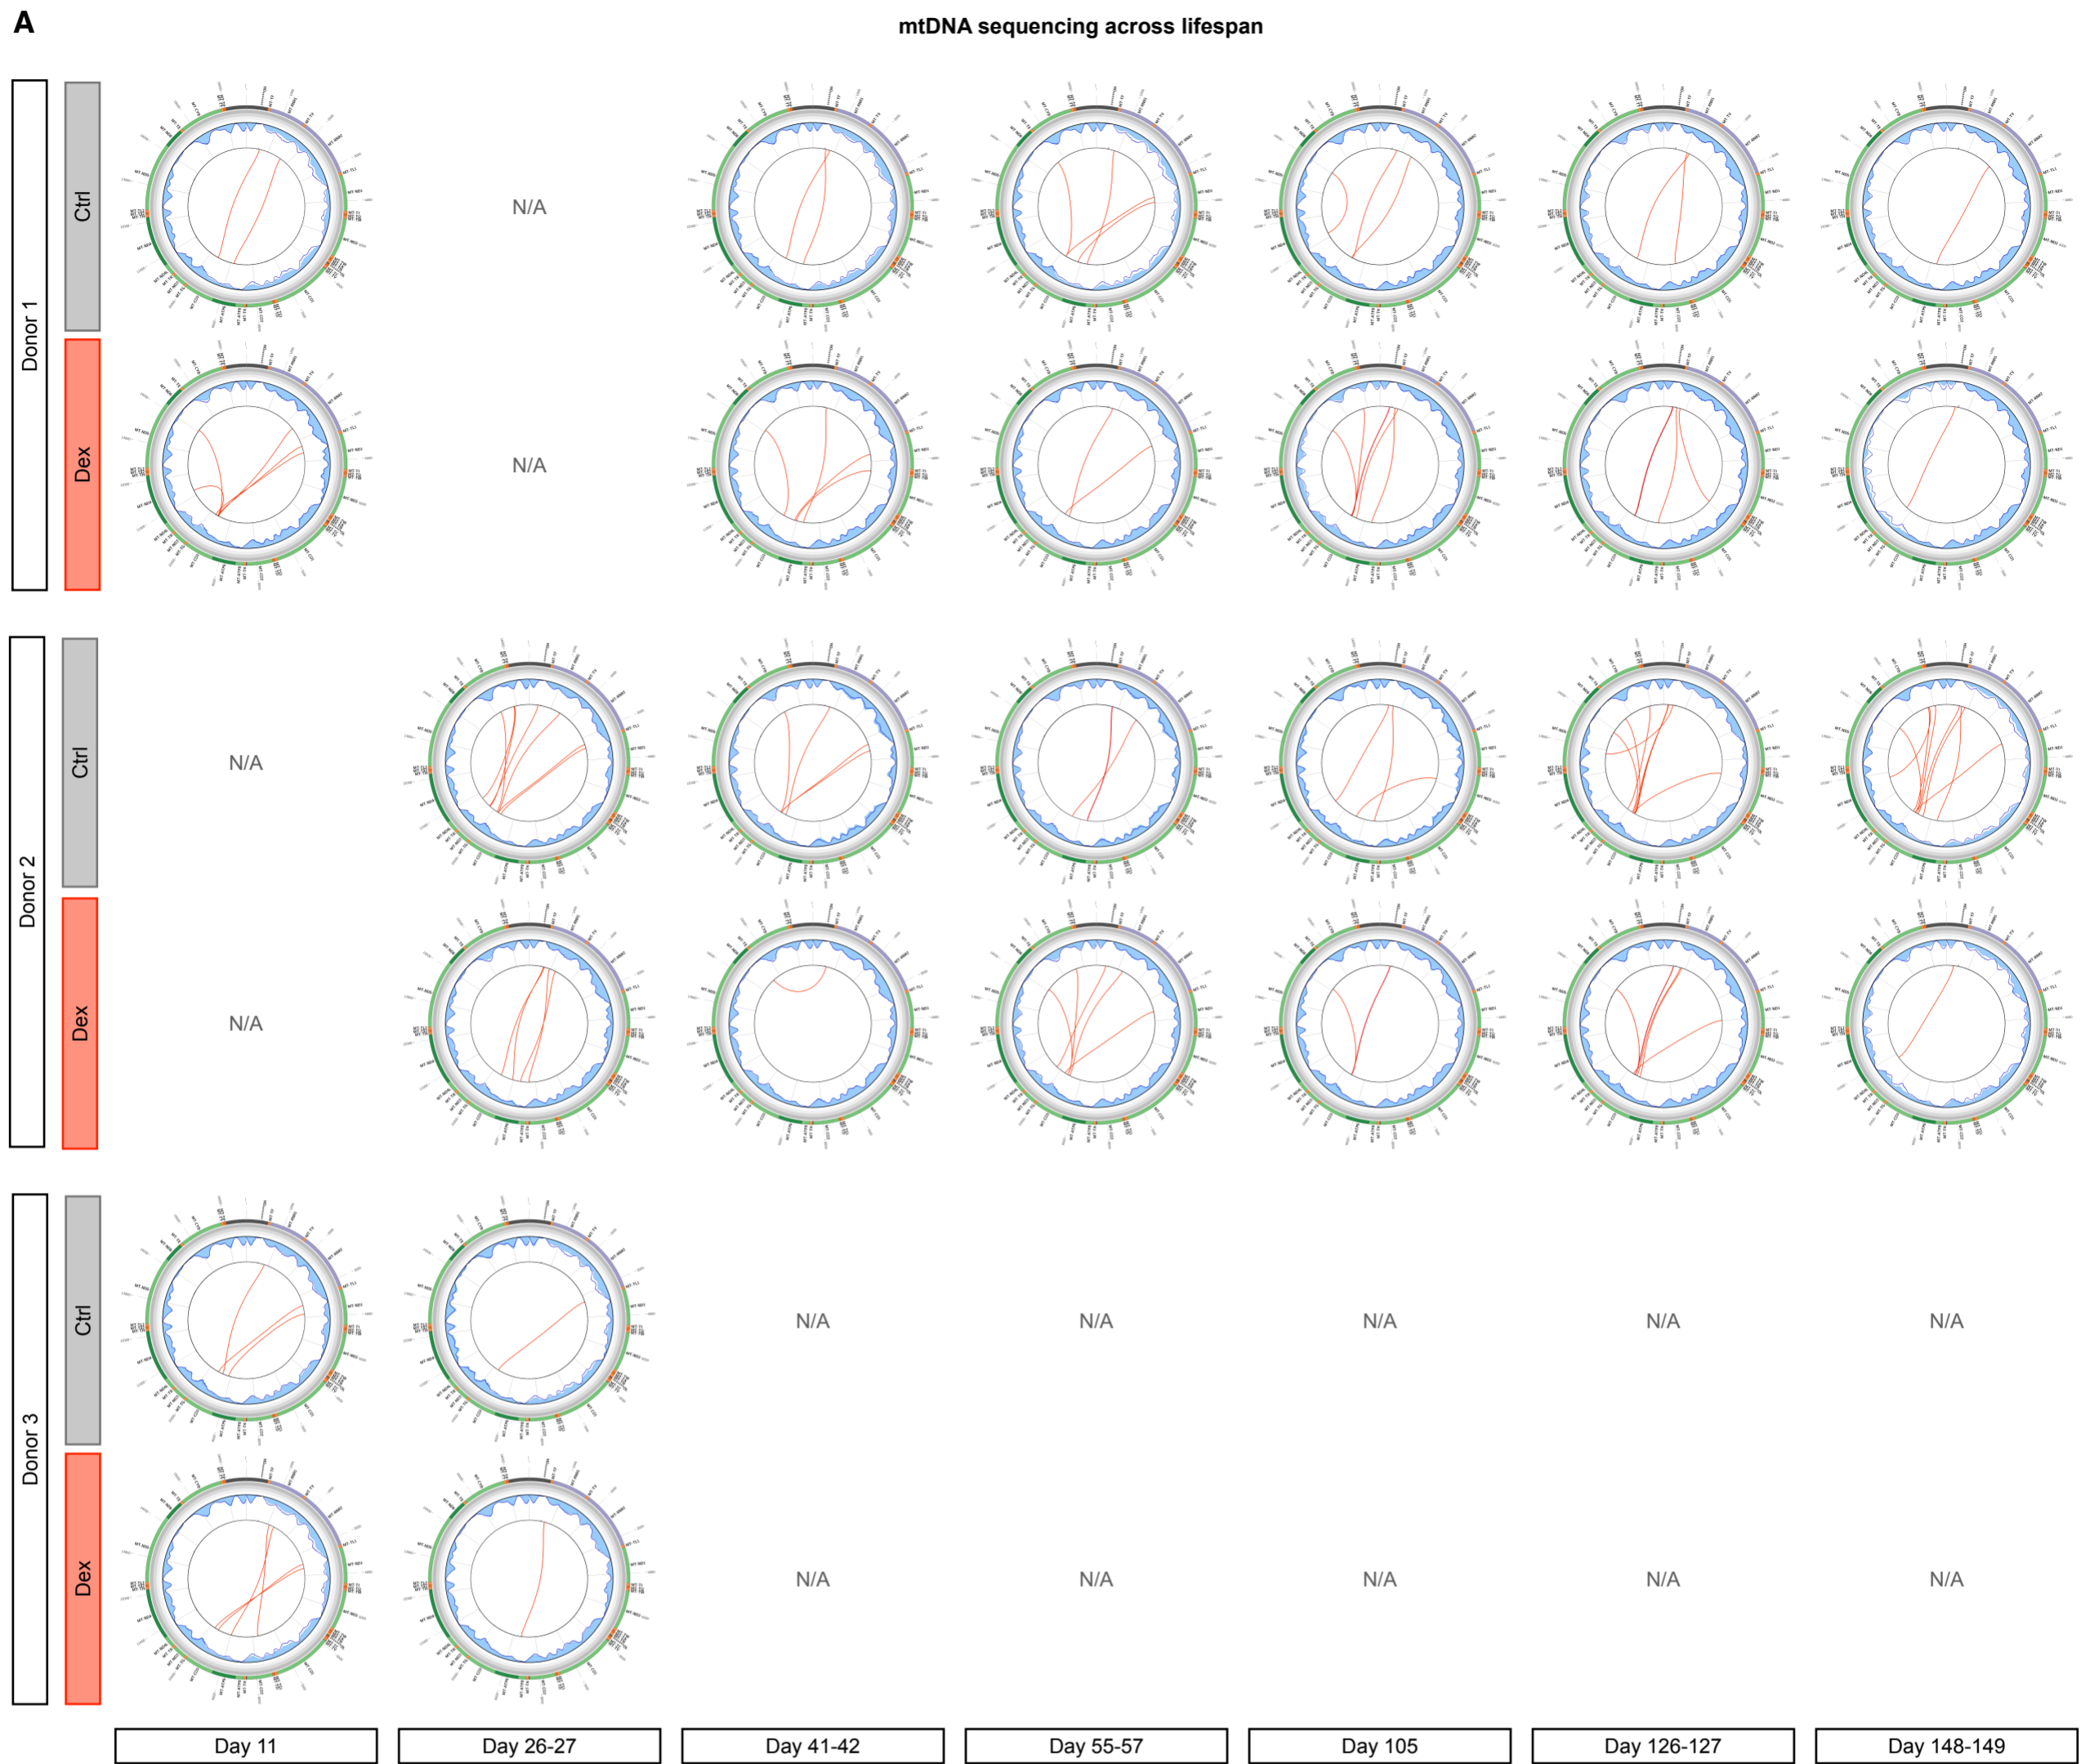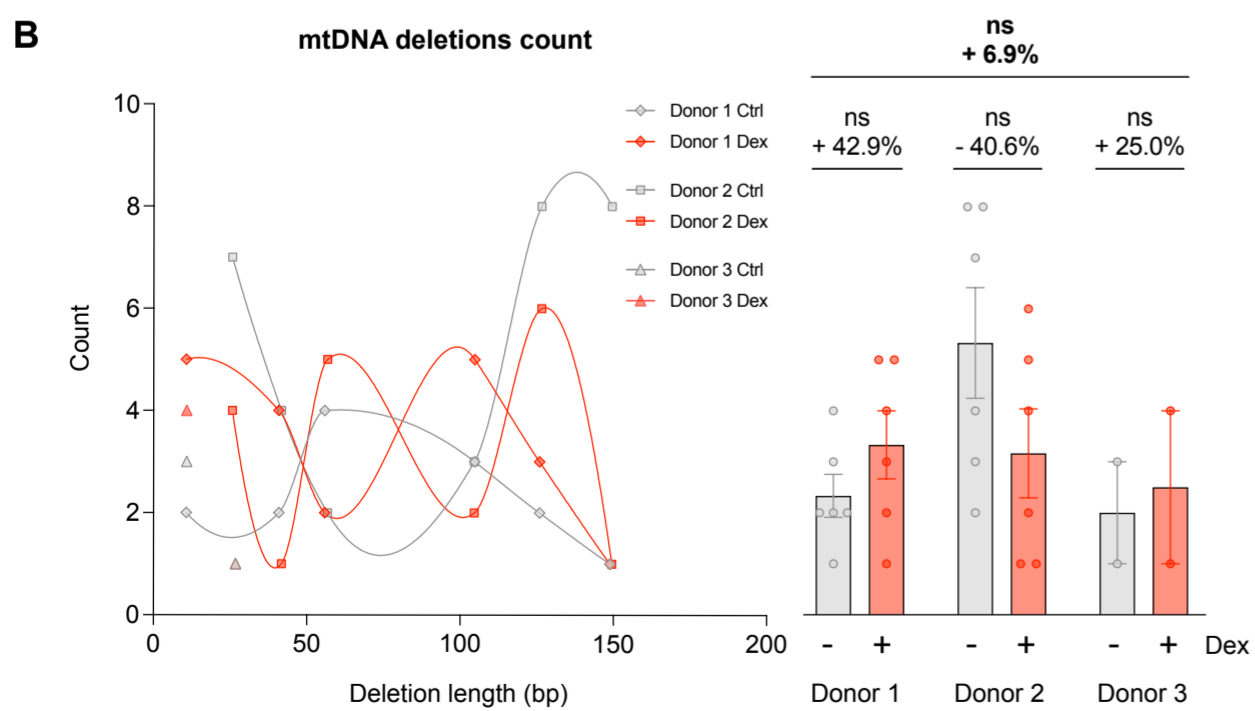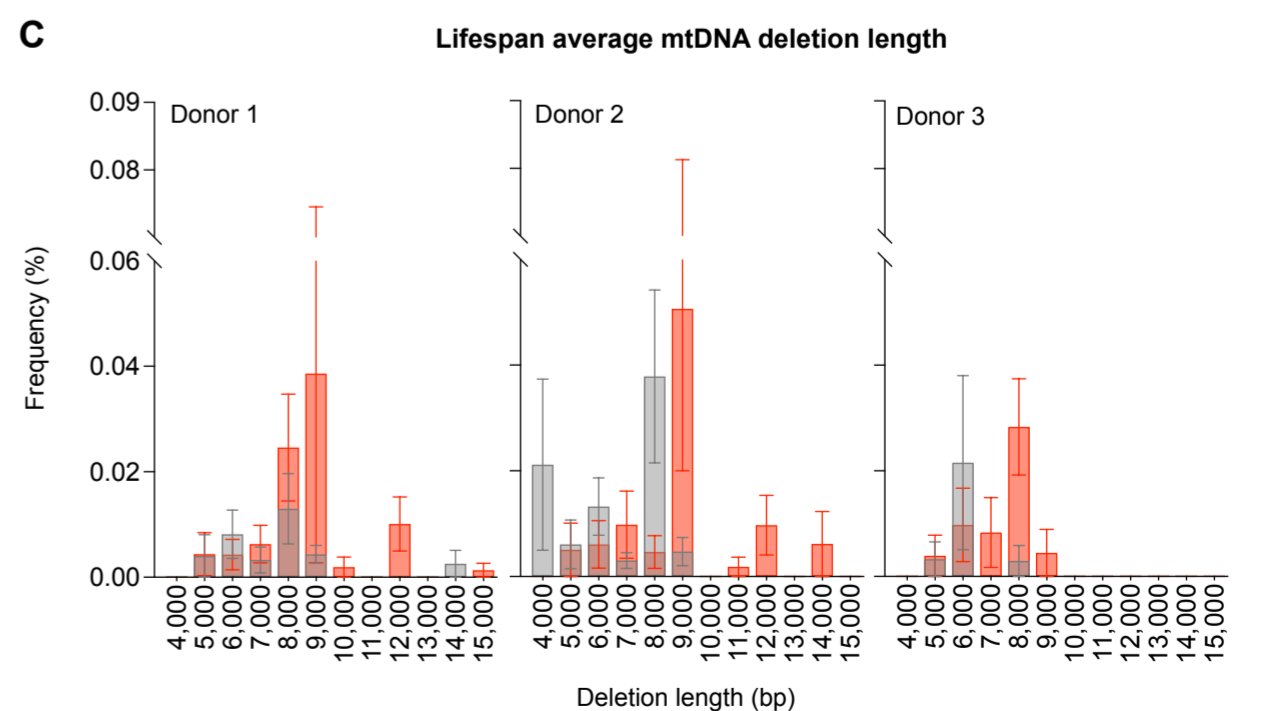

Figure S8 - Continued (2/2)

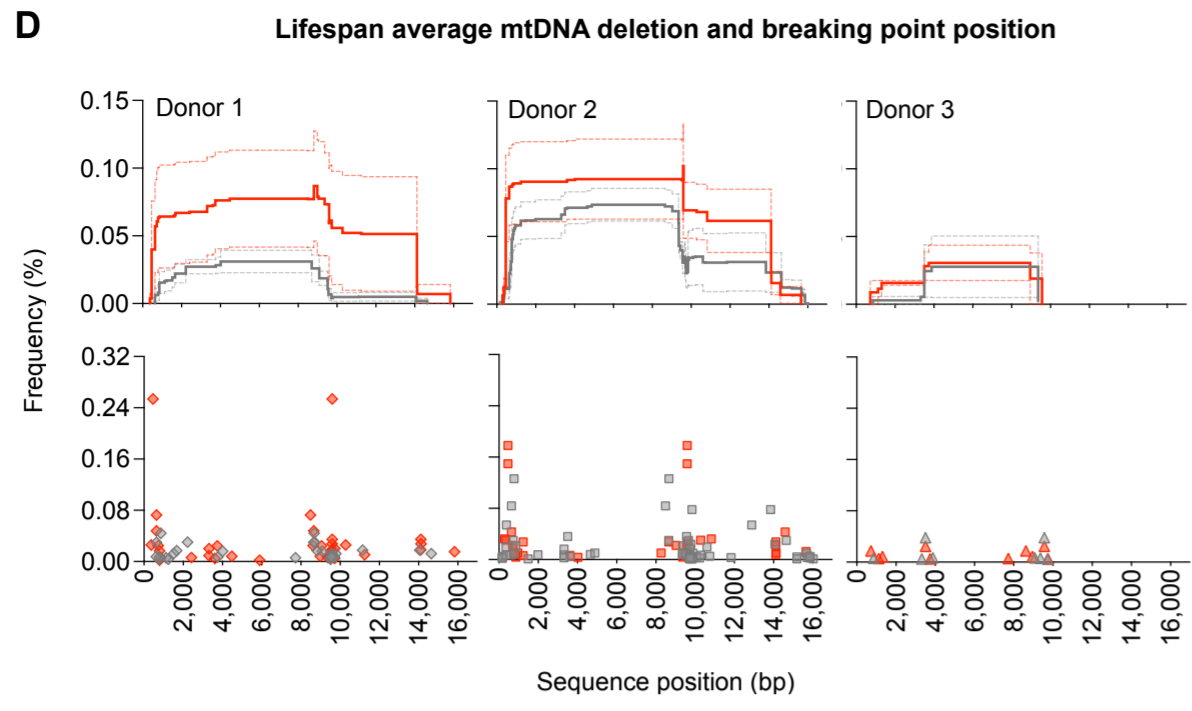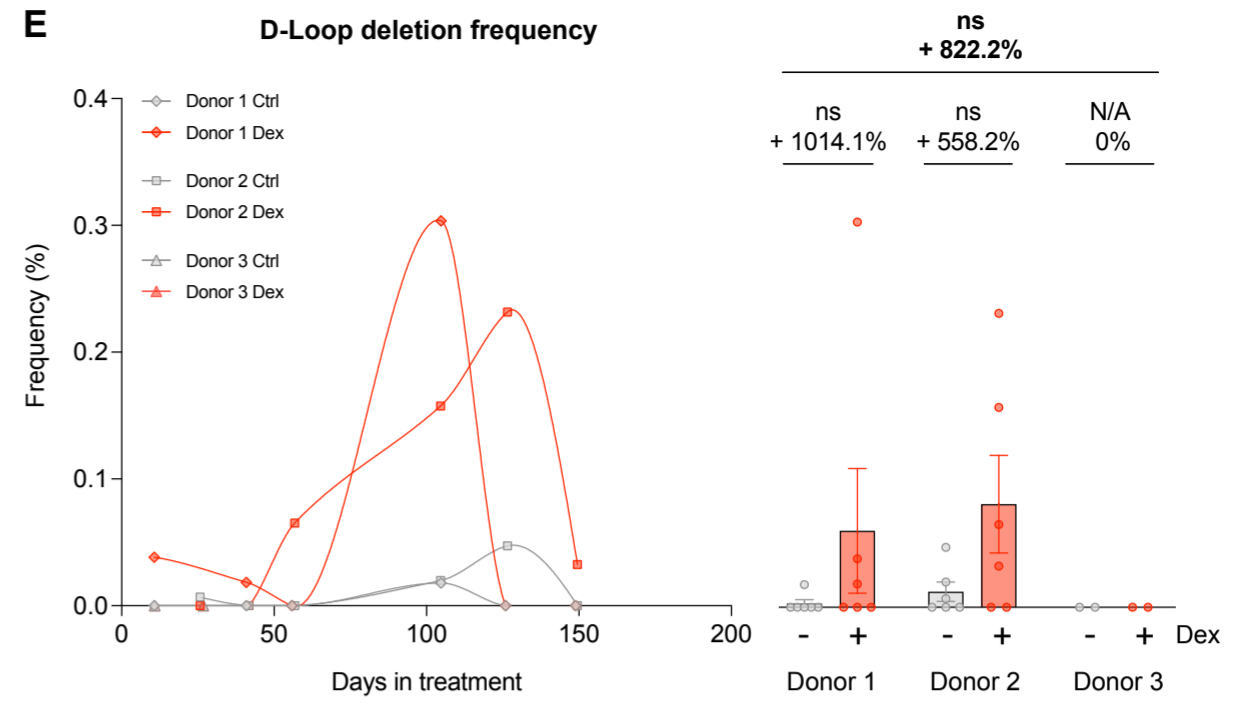

Figure S9

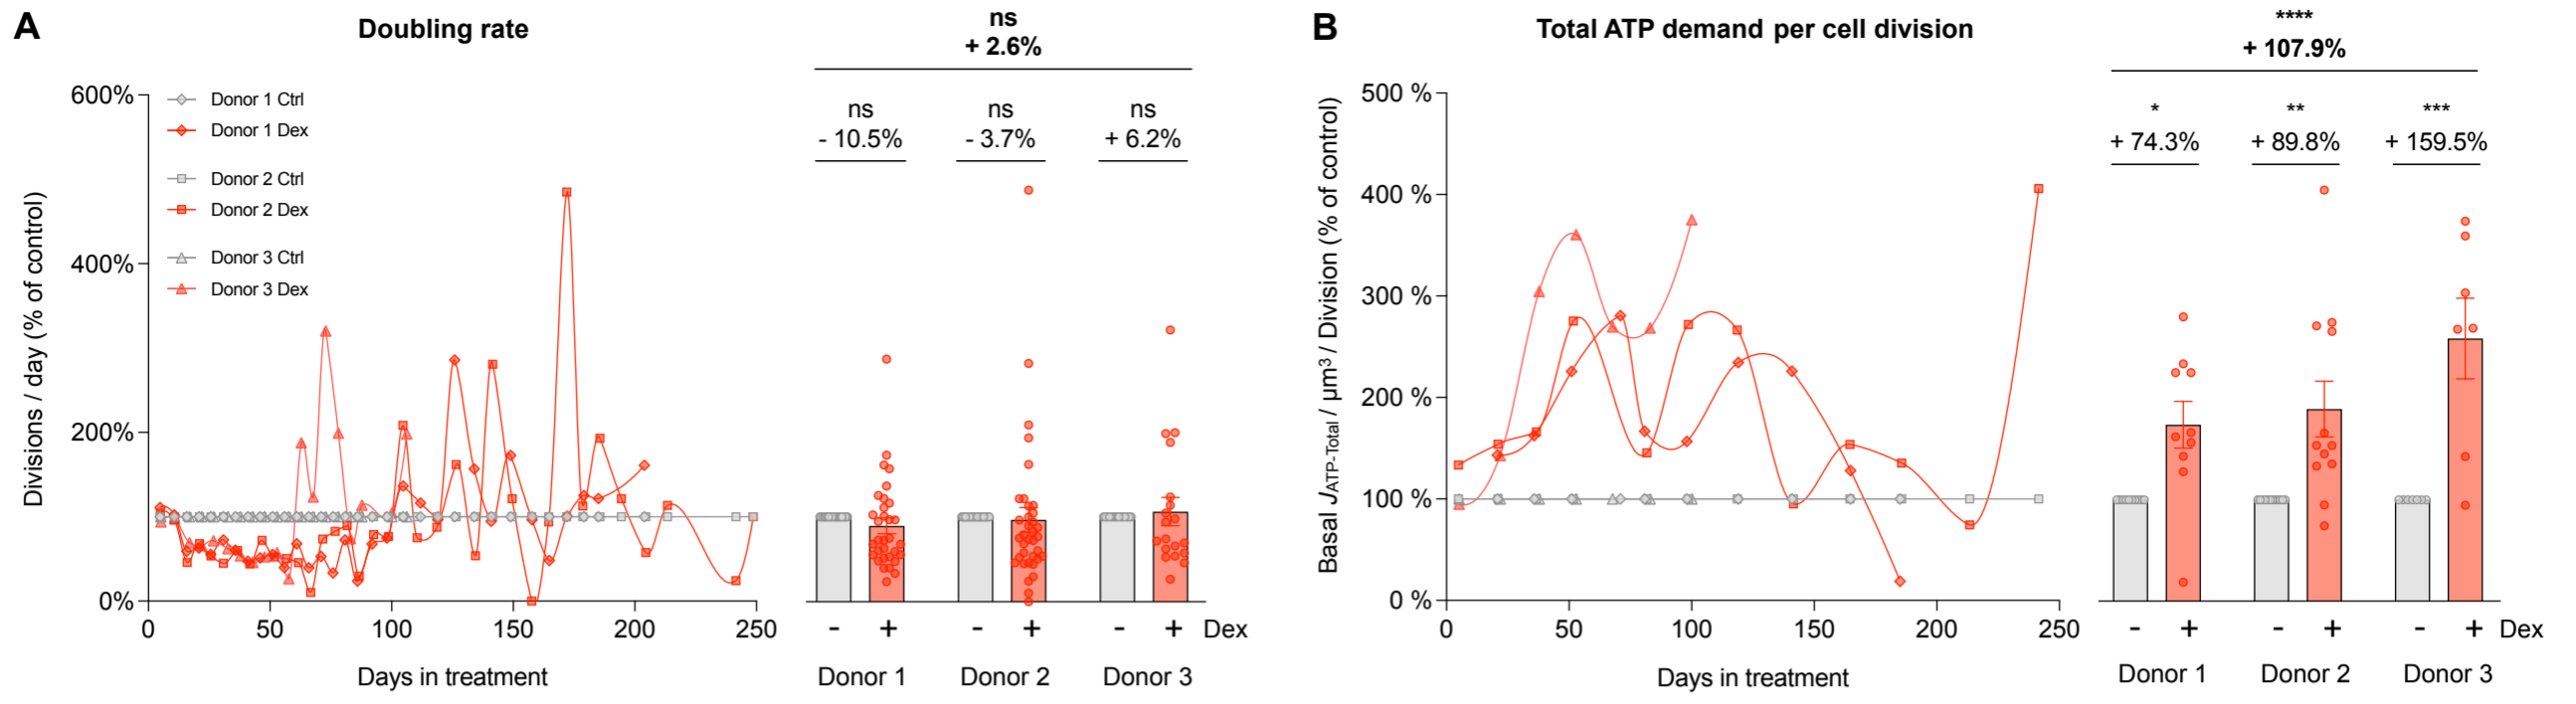

Figure S10

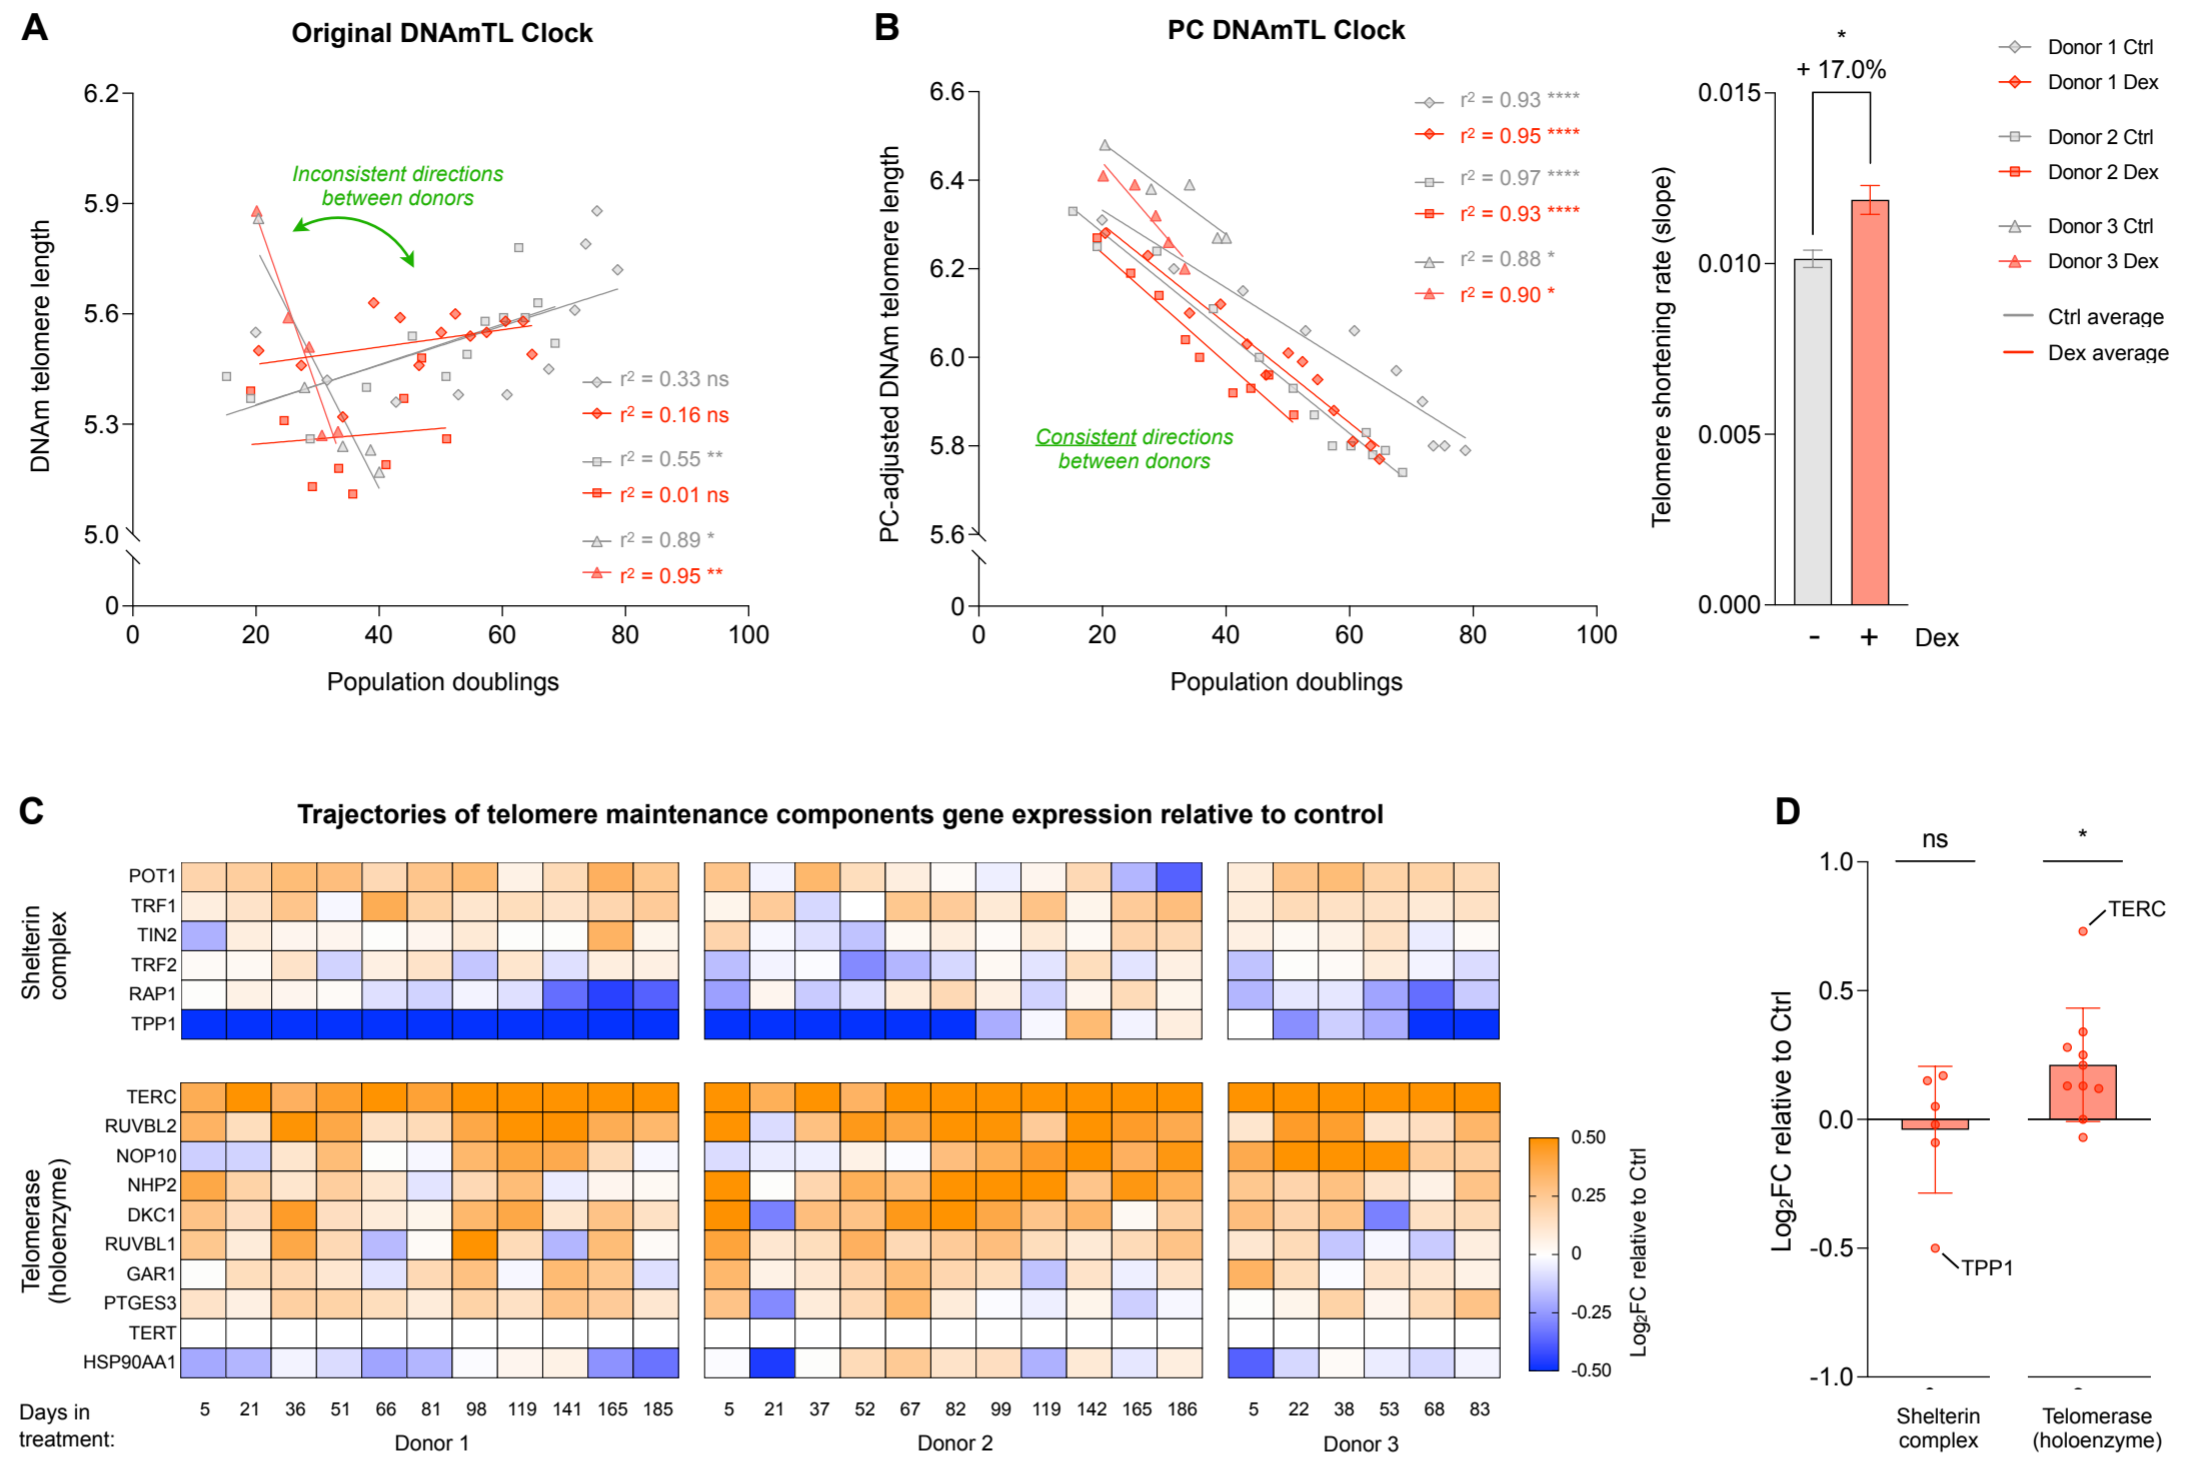

Figure S11

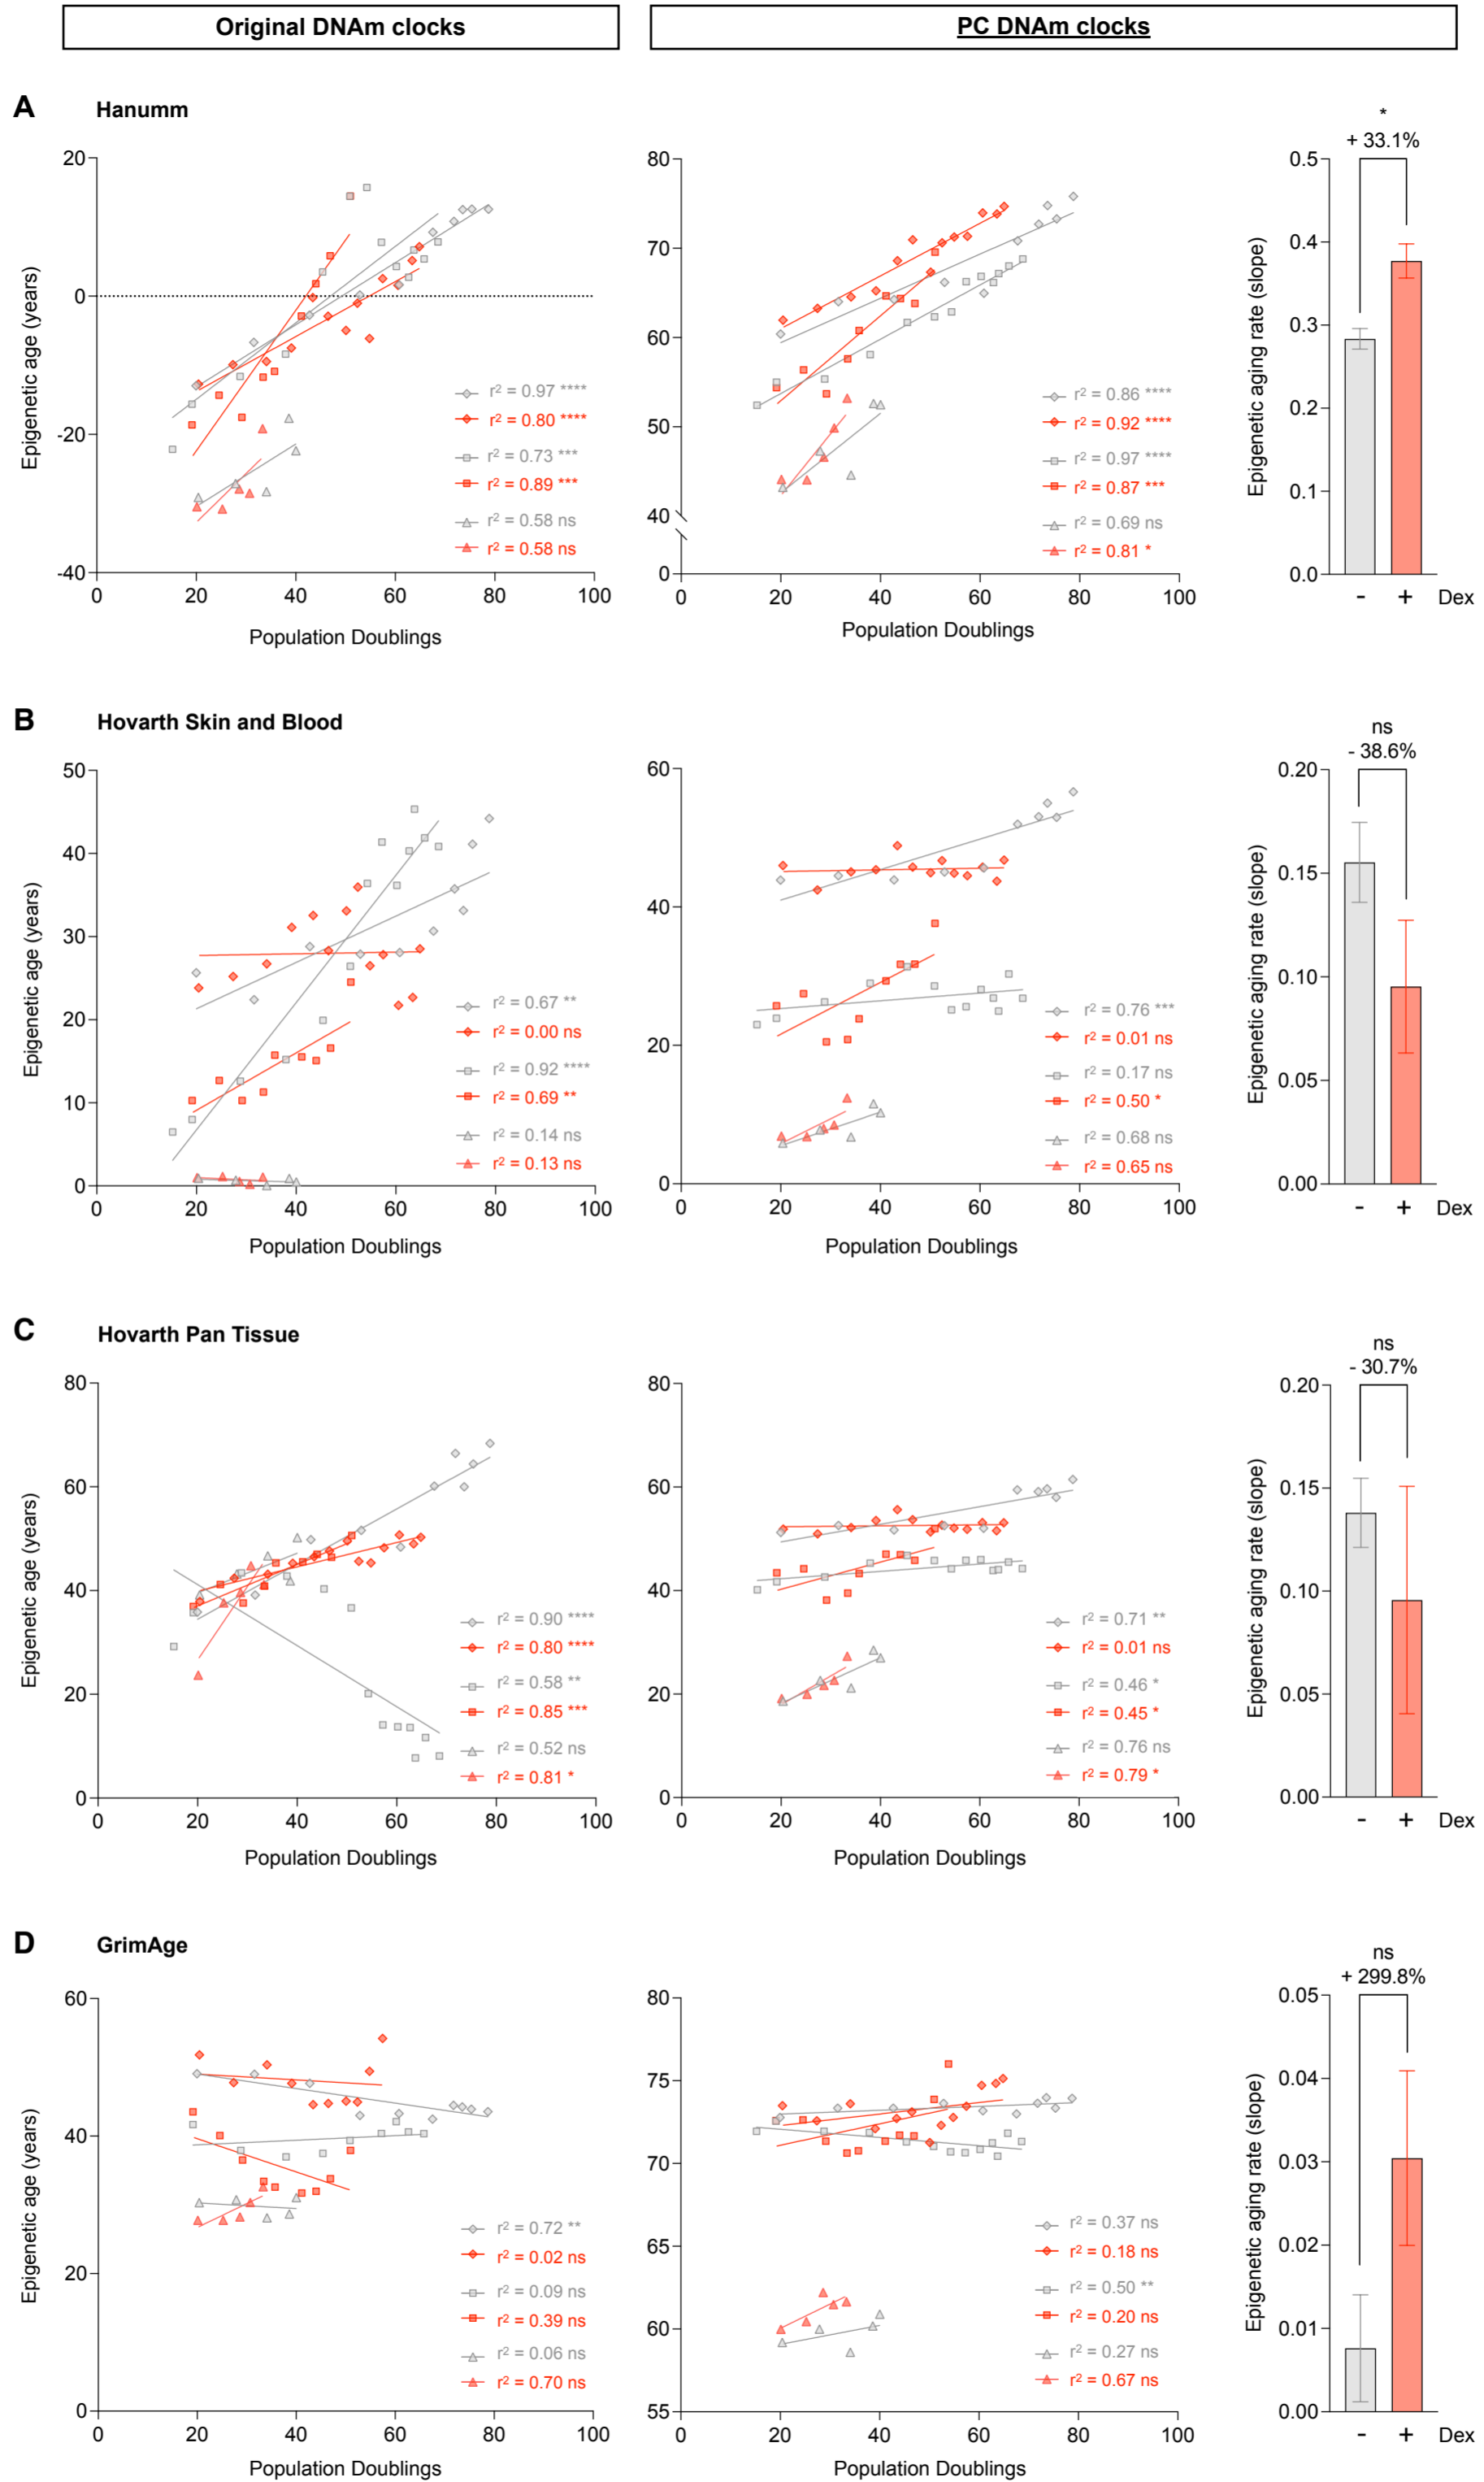

Figure S12

**A** Mitochondrial Nutrient Uptake Inhibitors (mitoNUTIs)

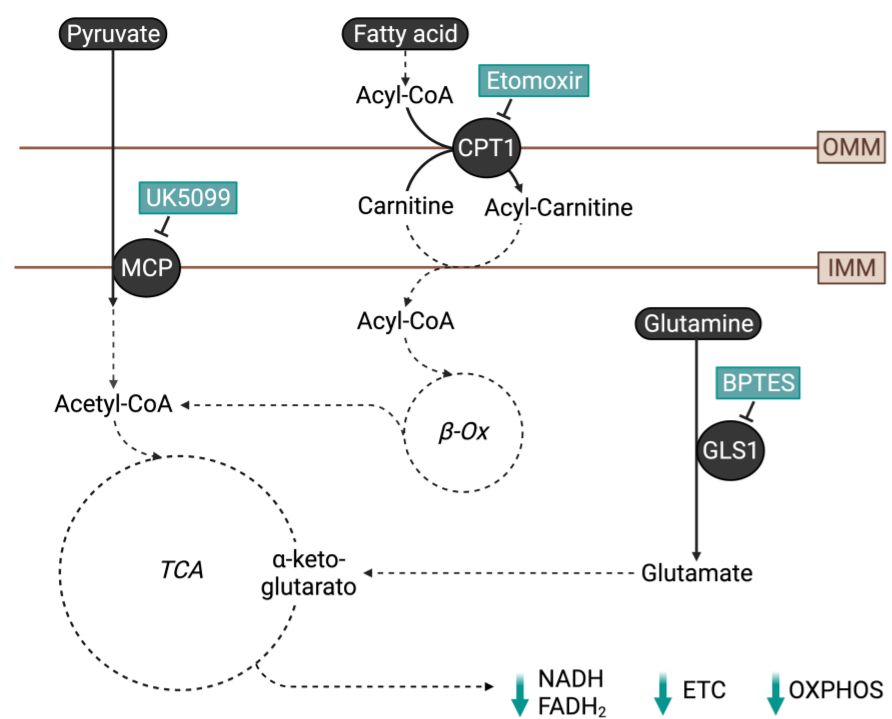

**B** ATP derived from OxPhos

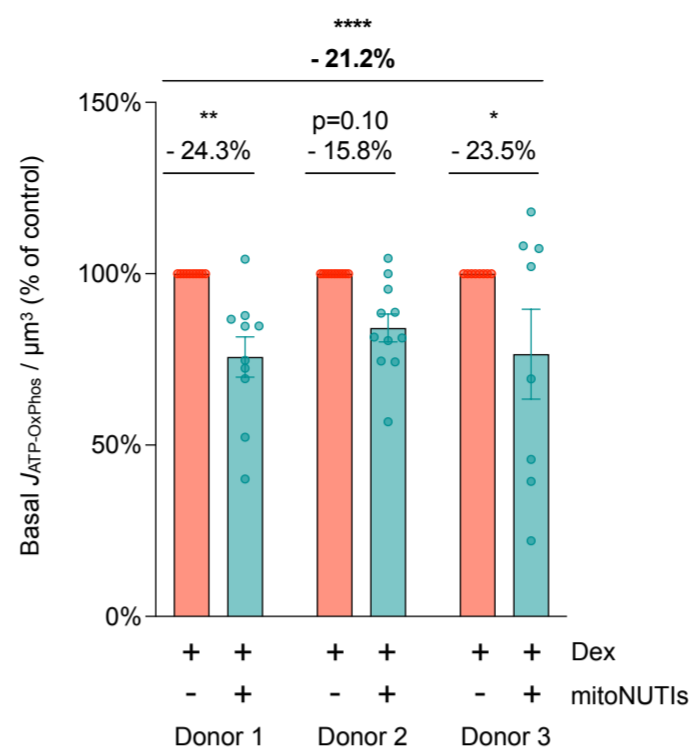

**C** ATP derived from Glycolysis

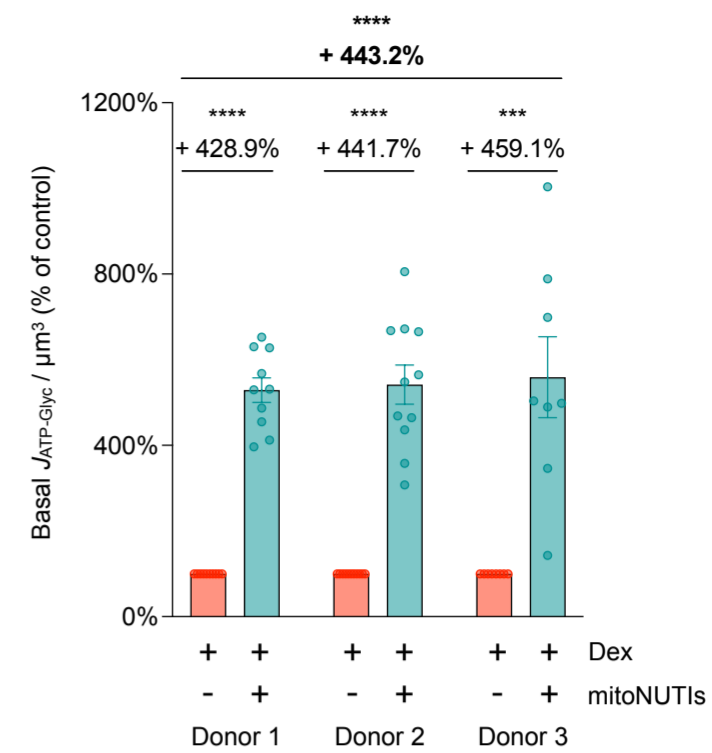

Supplement: Supplementary file [file media-1.pdf]
